# Supplementary material for: Divergence in spatial patterns of leaf stoichiometry between native and non-native plants across coastal wetlands
Source: Frontiers journal article supplement (doi:10.3389/fmars.2024.1425587), 2024-07-03
Supplement: Data_Sheet_1.xlsx [file Data_Sheet_1.xlsx]

## Sheet: Data
Reference	Site	Plant_identity	Species	Latitude	Longitude	MAT	Leaf_C	Leaf_N	Leaf_P	Leaf_CN	Leaf_CP	Leaf_NP
Almahasheer et al., 2018	Economic City, Saudi Arabia	Native	Avicennia marina	22.3833	39.1333	27.8167	425.2	10.7	0.7	39.7383	607.429	15.2857
Almahasheer et al., 2018	Khor Alkharar, Saudi Arabia	Native	Avicennia marina	22.9667	38.8333	29.3	443.8	10.6	0.6	41.8679	739.667	17.6667
Almahasheer et al., 2018	Petro Rabigh, Saudi Arabia	Native	Avicennia marina	22.75	39.0167	27.7833	434.4	13.5	0.8	32.1778	543	16.875
Almahasheer et al., 2018	Thuwal Island, Saudi Arabia	Native	Avicennia marina	22.2833	39.0833	27.8333	440.1	9.4	0.7	46.8191	628.714	13.4286
Alongi et al., 2002	Sawi Bay 1, Southern Thailand	Native	Rhizophora apiculata	10.28	99.1633	27.3417	419	13		37.6
Alongi et al., 2002	Sawi Bay 2, Southern Thailand	Native	Rhizophora apiculata	10.2783	99.1633	27.3417	438	10		51.1
Alongi et al., 2002	Sawi Bay 3, Southern Thailand	Native	Rhizophora apiculata	10.3733	99.22	27.3417	456	12		44.3
Alongi et al., 2002	Sawi Bay 4, Southern Thailand	Native	Ceriops decandra	10.3733	99.2217	27.3417	486	9		63
Anderson et al., 1997	Virginia Coast Reserve, USA	Native	Spartina alterniflora	37.47	-75.833	14.675	318	25.6		12.4219
Bedirkurum Çakir et al., 2010	Bafra District, Northern Turkey	Native	Artemisia santonicum	41.7047	36.0944			0.798	0.2223			3.58974
Çakir et al., 2010	Bafra District, Northern Turkey	Native	Euphorbia paralias	41.7047	36.0944			17.6	0.1613			109.113
Bedirkurum Çakir et al., 2010	Bafra District, Northern Turkey	Native	Otanthus maritimus	41.7047	36.0944			0.624	0.219			2.84932
Bedirkurum Çakir et al., 2010	Bafra District, Northern Turkey	Native	Salicornia prostrata	41.7047	36.0944			1.306	0.305			4.28197
Bedirkurum Çakir et al., 2010	Bafra District, Northern Turkey	Native	Spergularia marina	41.7047	36.0944			0.62	0.2466			2.51419
Bernini et al., 2010	São Mateus River Estuary, Espirito Santo, Brazil	Native	Laguncularia racemosa	-18.5833	-39.7333	23.8856		10.2	1.2			8.5
Bernini et al., 2010	São Mateus River Estuary, Espirito Santo, Brazil	Native	Laguncularia racemosa	-18.5833	-39.7333	23.8856		15.4	1.8			8.55556
Bernini et al., 2010	São Mateus River Estuary, Espirito Santo, Brazil	Native	Laguncularia racemosa	-18.5833	-39.7333	23.8856		13.7	1.7			8.05882
Bernini et al., 2010	São Mateus River Estuary, Espirito Santo, Brazil	Native	Rhizophora mangle	-18.5833	-39.7333	23.8856		11.8	1.1			10.7273
Bernini et al., 2010	São Mateus River Estuary, Espirito Santo, Brazil	Native	Rhizophora mangle	-18.5833	-39.7333	23.8856		15	1.1			13.6364
Bernini et al., 2010	São Mateus River Estuary, Espirito Santo, Brazil	Native	Rhizophora mangle	-18.5833	-39.7333	23.8856		13.7	0.9			15.2222
Boto & Wellington, 1983	Hinchibrook Island 1, Northern Queensland, Australia	Native	Bruguiera gymnorhiza	-18.2167	146.183			10.4	0.77			13.5065
Boto & Wellington, 1983	Hinchibrook Island 1, Northern Queensland, Australia	Native	Ceriops tagal	-18.2167	146.183			8.2	0.8			10.25
Boto & Wellington, 1983	Hinchibrook Island 1, Northern Queensland, Australia	Native	Rhizophor apiculata	-18.2167	146.183			8.1	0.84			9.64286
Boto & Wellington, 1983	Hinchibrook Island 1, Northern Queensland, Australia	Native	Rhizophor lamarck	-18.2167	146.183			8.5	0.76			11.1842
Boto & Wellington, 1983	Hinchibrook Island 1, Northern Queensland, Australia	Native	Rhizophor stylos	-18.2167	146.183			9.1	0.84			10.8333
Boyer et al., 2001	Mugu Lagoon, Southern California, USA	Native	Salicornia virginica	34.1	-119.083	16.0083		16.1	1.5			10.6
Bruland & MacKenzie, 2010	Hawaiian Islands 1, USA	Non-native	Ageritum conyzoides	21	-157					14
Bruland & MacKenzie, 2010	Hawaiian Islands 1, USA	Native	Bacopa monnieri	21	-157					26
Bruland & MacKenzie, 2010	Hawaiian Islands 1, USA	Native	Bolboschoenus maritimus	21	-157					22
Bruland & MacKenzie, 2010	Hawaiian Islands 1, USA	Non-native	Chloris barbata	21	-157					21
Bruland & MacKenzie, 2010	Hawaiian Islands 1, USA	Non-native	Commelina diffusa	21	-157					14
Bruland & MacKenzie, 2010	Hawaiian Islands 1, USA	Non-native	Cyperus involucratus	21	-157					35
Bruland & MacKenzie, 2010	Hawaiian Islands 1, USA	Non-native	Cyperus javanicus	21	-157					51
Bruland & MacKenzie, 2010	Hawaiian Islands 1, USA	Non-native	Cyperus papyrus	21	-157					37
Bruland & MacKenzie, 2010	Hawaiian Islands 1, USA	Non-native	Echinochloa crus-galli	21	-157					36
Bruland & MacKenzie, 2010	Hawaiian Islands 1, USA	Non-native	Eichhornia crassipes	21	-157					12
Bruland & MacKenzie, 2010	Hawaiian Islands 1, USA	Non-native	Ludwigia palustris	21	-157					14
Bruland & MacKenzie, 2010	Hawaiian Islands 1, USA	Non-native	Panicum maximum	21	-157					25
Bruland & MacKenzie, 2010	Hawaiian Islands 1, USA	Non-native	Paspalum conjugatum	21	-157					24
Bruland & MacKenzie, 2010	Hawaiian Islands 1, USA	Non-native	Paspalum vaginatum	21	-157					38
Bruland & MacKenzie, 2010	Hawaiian Islands 1, USA	Non-native	Pennisetum setaceum	21	-157					65
Bruland & MacKenzie, 2010	Hawaiian Islands 1, USA	Non-native	Ricinus communis	21	-157					8
Bruland & MacKenzie, 2010	Hawaiian Islands 1, USA	Non-native	Sagittaria latifolia	21	-157					9
Bruland & MacKenzie, 2010	Hawaiian Islands 1, USA	Non-native	Schoenoplectus californicus	21	-157					31
Bruland & MacKenzie, 2010	Hawaiian Islands 1, USA	Native	Sesuvium portulacastrum	21	-157					27
Bruland & MacKenzie, 2010	Hawaiian Islands 1, USA	Non-native	Typha latifolia	21	-157					29
Bruland & MacKenzie, 2010	Hawaiian Islands 1, USA	Non-native	Urochloa mutica	21	-157					22
Buresh et al., 1980	Barataria Bay, Louisiana, USA	Native	Spartina alterniflora	29.25	-90.15	20.8667		9.30986	1.19197			7.81046
Buresh et al., 1980	Barataria Bay, Louisiana, USA	Native	Spartina alterniflora	29.25	-90.15	20.8667		9.37614	1.25759			7.45564
Buresh et al., 1980	Barataria Bay, Louisiana, USA	Native	Spartina alterniflora	29.25	-90.15	20.8667		7.12445	0.992473			7.17849
Buresh et al., 1980	Barataria Bay, Louisiana, USA	Native	Spartina alterniflora	29.25	-90.15	20.8667		6.95512	0.989997			7.02539
Buresh et al., 1980	Barataria Bay, Louisiana, USA	Native	Spartina alterniflora	29.25	-90.15	20.8667		7.13406	0.763283			9.34655
Buresh et al., 1980	Barataria Bay, Louisiana, USA	Native	Spartina alterniflora	29.25	-90.15	20.8667		7.43622	0.539193			13.7914
Cartaxana & Catarino, 1997	The Tagus Estuary 2, Portugal	Native	Arthrocnemum perenne	38.8333	-8.95	16.7167	271.5	12.1		22.815
Cartaxana & Catarino, 1997	The Tagus Estuary 2, Portugal	Native	Halimione portulacoides	38.8333	-8.95	16.7167	272.1	12.5		21.89
Cartaxana & Catarino, 1997	The Tagus Estuary 2, Portugal	Native	Spartina maritima	38.8333	-8.95	16.7167	412	18.8		22.675
Cartaxana & Catarino, 2002	The Tagus Estuary, Portugal	Native	Arthrocnemum perenne	38.8333	-8.95	16.7167		18.4
Cartaxana & Catarino, 2002	The Tagus Estuary, Portugal	Native	Halimione portulacoides	38.8333	-8.95	16.7167		16.4
Cartaxana & Catarino, 2002	The Tagus Estuary, Portugal	Native	Spartina maritima	38.8333	-8.95	16.7167		24.2
Chen et al., 2017	Changyi, Shandong, China	Native	Phragmites australis	37.1	119.367	12.9		16.7	1.32			14.28
Chen et al., 2017	Changyi, Shandong, China	Native	Phragmites australis	37.1	119.367	12.9		19.13	1.33			12.87
Chen et al., 2017	Changyi, Shandong, China	Native	Tamarix chinensis	37.1	119.367	12.9		17.97	1.35			16.93
Chen et al., 2017	Changyi, Shandong, China	Native	Tamarix chinensis	37.1	119.367	12.9		22.15	1.33			15.52
Cui, 2014	Yongding New River Estuary, Tianjin, China	Native	Suaeda salsa	39.096	117.73	12.6583	309	18.59	2.403	17.35	160.546	9.128
da Cruz et al., 2013	The Bragança Peninsula, Northern Brazil	Native	Avicennia germinans	-0.934722	-46.6692	26.35			1.07
da Cruz et al., 2013	The Bragança Peninsula, Northern Brazil	Native	Avicennia germinans	-0.934722	-46.6692	26.35			1.23
da Cruz et al., 2013	The Bragança Peninsula, Northern Brazil	Native	Rhizophora mangle	-0.934722	-46.6692	26.35			1.29
da Cruz et al., 2013	The Bragança Peninsula, Northern Brazil	Native	Rhizophora mangle	-0.934722	-46.6692	26.35			1.55
Drake et al., 2008	Plum Island Sound Estuary 1, Massachusetts, USA	Native	Spartina alterniflora	42.73	-70.84	9.29167		9.5
Drake et al., 2008	Plum Island Sound Estuary 1, Massachusetts, USA	Native	Spartina patens	42.73	-70.84	9.29167		8.2
Duarte et al., 2018	KAUST 02, Arabian Red Sea	Native	Avicennia marina	18.008	41.616	27.3083	438.068	17.151		30.548
Duarte et al., 2018	KAUST 04, Arabian Red Sea	Native	Avicennia marina	18.117	41.567	27.3083	436.939	14.5745		35.2685
Duarte et al., 2018	KAUST 15, Arabian Red Sea	Native	Avicennia marina	19.528	40.741	30.46	586.284	20.787		33.6282
Duarte et al., 2018	KAUST 17, Arabian Red Sea	Native	Avicennia marina	19.615	40.646	30.46	524.147	26.4816		24.0328
Duarte et al., 2018	KAUST 29, Arabian Red Sea	Native	Avicennia marina	20.159	40.22	28.7167	642.621	24.4859		31.675
Duarte et al., 2018	KAUST 30, Arabian Red Sea	Native	Avicennia marina	20.159	40.22	28.7167	557.669	24.4269		26.9046
Duarte et al., 2018	KAUST 39, Arabian Red Sea	Native	Avicennia marina	22.281	39.096	27.8917	456.095	17.1477		32.2137
Duarte et al., 2018	KAUST 42, Arabian Red Sea	Native	Avicennia marina	22.392	39.13	27.6167	446.828	13.8771		38.6306
Duarte et al., 2018	KAUST 44, Arabian Red Sea	Native	Salicornia sp	22.392	39.13	27.6917	308.237	12.8086		29.3327
Duarte et al., 2018	KAUST 44, Arabian Red Sea	Native	Zygophyllumm cocenium	22.392	39.13	27.6917	349.972	9.83657		42.0377
Duarte et al., 2018	KAUST 47, Arabian Red Sea	Native	Avicennia marina	22.753	39.013	27.6917	459.943	15.5342		34.5449
Duarte et al., 2018	KAUST 47, Arabian Red Sea	Native	Suaeda monoica	22.753	39.013	27.6917	385.093	29.0399		15.6873
Duarte et al., 2018	KAUST 50, Arabian Red Sea	Native	Anabasis setifera	22.97	38.846	27.0583	312.101	5.0017		72.7985
Duarte et al., 2018	KAUST 50, Arabian Red Sea	Native	Avicennia marina	22.97	38.846	27.0583	466.139	12.9685		42.1376
Duarte et al., 2018	KAUST 52, Arabian Red Sea	Native	Anabasis setifera	22.97	38.87	27.125	299.831	4.28485		81.6594
Duarte et al., 2018	KAUST 52, Arabian Red Sea	Native	Salicornia sp	22.97	38.87	27.125	335.481	12.5765		31.5096
Duarte et al., 2018	KAUST 60, Arabian Red Sea	Native	Avicennia marina	25.307	37.113	19.48	450.734	14.2287		36.9573
Duarte et al., 2018	KAUST 64, Arabian Red Sea	Native	Avicennia marina	25.368	36.909	22.28	513.319	28.8796		21.9123
Duarte et al., 2018	KAUST 71, Arabian Red Sea	Native	Avicennia marina	25.715	36.576	24.8667	608.937	26.9951		26.3169
Duarte et al., 2018	KAUST 73, Arabian Red Sea	Native	Avicennia marina	25.717	36.56	24.8667	574.956	21.5727		32.1769
Duarte et al., 2018	KAUST 76, Arabian Red Sea	Native	Avicennia marina	25.993	36.708	25.2667	410.46	16.0113		30.0845
Duarte et al., 2018	KAUST 78, Arabian Red Sea	Native	Avicennia marina	26.915	36.011	25.0583	411.823	17.2742		27.8137
Elsey-Quirk et al., 2011	Little Assawoman Bay, Delaware, USA	Native	Baccharis halimifolia	38.5	-75.0667	13.425		18.6
Elsey-Quirk et al., 2011	Little Assawoman Bay, Delaware, USA	Native	Juncus roemerianus	38.5	-75.0667	13.425		9.8
Elsey-Quirk et al., 2011	Little Assawoman Bay, Delaware, USA	Native	Spartina alterniflora	38.5	-75.0667	13.425		13.1
Elsey-Quirk et al., 2011	Little Assawoman Bay, Delaware, USA	Native	Spartina patens	38.5	-75.0667	13.425		9.4
Feller et al., 2002	Twin Cays 3, Belize	Native	Rhizophora mangle	16.8333	-88.1			8.9	0.6			15.3
Feller et al., 2002	Twin Cays 3, Belize	Native	Rhizophora mangle	16.8333	-88.1			9.1	0.52			17.8
Feller et al., 2002	Twin Cays 3, Belize	Native	Rhizophora mangle	16.8333	-88.1			9.6	0.38			24
Fitch et al., 2009	Webhannet River Marsh, Maine, USA	Native	Spartina alterniflora	43.3	-70.5833	8.175		13.18
Fitch et al., 2009	Webhannet River Marsh, Maine, USA	Native	Spartina patens	43.3	-70.5833	8.175		11.15
Fry & Cormier, 2011	Kaloko, Hawaiian Islands, USA	Non-native	Rhizophora mangle	21.3	-157.65	24.3833	444	9.758	0.868	55	1367	26
Fry & Cormier, 2011	Moloka‘I, Hawaiian Islands, USA	Non-native	Rhizophora mangle	21.11	-157.07	24.2167	422.4	9.212	1.023	56	1081	20
Fry & Cormier, 2011	Urban O‘ahu, Hawaiian Islands, USA	Non-native	Rhizophora mangle	21.34	-157.96	24.4833	471.6	16.8	1.24	34	1012	30
Fry & Cormier, 2011	Hawaiian Islands, USA	Non-native	Rhizophora mangle	21.29	-157.67	24.4583	458.4	12.992	0.961	42	1227	30
Fry et al., 2000	Biscayne, South Florida, USA	Native	Rhizophora mangle	25.4667	-80.35	24.375		15.1234
Fry et al., 2000	Biscayne, South Florida, USA	Native	Rhizophora mangle	25.4667	-80.35	24.375		13.3916
Fry et al., 2000	Biscayne, South Florida, USA	Native	Rhizophora mangle	25.4667	-80.35	24.375		12.4006
Fry et al., 2000	Biscayne, South Florida, USA	Native	Rhizophora mangle	25.4667	-80.35	24.375		20.2904
Fry et al., 2000	Biscayne, South Florida, USA	Native	Rhizophora mangle	25.4667	-80.35	24.375		15.9324
Fry et al., 2000	Biscayne, South Florida, USA	Native	Rhizophora mangle	25.4667	-80.35	24.375		12.835
Fry et al., 2000	Biscayne, South Florida, USA	Native	Rhizophora mangle	25.4667	-80.35	24.375		12.729
Fry et al., 2000	Biscayne, South Florida, USA	Native	Rhizophora mangle	25.4667	-80.35	24.375		11.3338
Fry et al., 2000	Biscayne, South Florida, USA	Native	Rhizophora mangle	25.4667	-80.35	24.375		12.0933
Fry et al., 2000	Biscayne, South Florida, USA	Native	Rhizophora mangle	25.4667	-80.35	24.375		10.7515
Fry et al., 2000	N Key Largo, South Florida, USA	Native	Rhizophora mangle	25.2833	-80.3	24.4667		10.5878
Fry et al., 2000	N Key Largo, South Florida, USA	Native	Rhizophora mangle	25.2833	-80.3	24.4667		12.8785
Fry et al., 2000	N Key Largo, South Florida, USA	Native	Rhizophora mangle	25.2833	-80.3	24.4667		14.7267
Fry et al., 2000	N Key Largo, South Florida, USA	Native	Rhizophora mangle	25.2833	-80.3	24.4667		15.1925
Fry et al., 2000	N Key Largo, South Florida, USA	Native	Rhizophora mangle	25.2833	-80.3	24.4667		13.5951
Fry et al., 2000	N Key Largo, South Florida, USA	Native	Rhizophora mangle	25.2833	-80.3	24.4667		13.4367
Fry et al., 2000	N Key Largo, South Florida, USA	Native	Rhizophora mangle	25.2833	-80.3	24.4667		14.3134
Fry et al., 2000	N Key Largo, South Florida, USA	Native	Rhizophora mangle	25.2833	-80.3	24.4667		13.2485
Fry et al., 2000	N Key Largo, South Florida, USA	Native	Rhizophora mangle	25.2833	-80.3	24.4667		12.4546
Fry et al., 2000	Sugarloaf, South Florida, USA	Native	Rhizophora mangle	25.25	-80.45	24.575		11.0174
Fry et al., 2000	Sugarloaf, South Florida, USA	Native	Rhizophora mangle	25.25	-80.45	24.575		11.7856
Fry et al., 2000	Sugarloaf, South Florida, USA	Native	Rhizophora mangle	25.25	-80.45	24.575		11.9873
Fry et al., 2000	Sugarloaf, South Florida, USA	Native	Rhizophora mangle	25.25	-80.45	24.575		12.9321
Fry et al., 2000	Sugarloaf, South Florida, USA	Native	Rhizophora mangle	25.25	-80.45	24.575		11.2797
Fry et al., 2000	Sugarloaf, South Florida, USA	Native	Rhizophora mangle	25.25	-80.45	24.575		11.8513
Fry et al., 2000	Sugarloaf, South Florida, USA	Native	Rhizophora mangle	25.25	-80.45	24.575		9.55202
Fry et al., 2000	Sugarloaf, South Florida, USA	Native	Rhizophora mangle	25.25	-80.45	24.575		10.6428
Gao et al., 2006	Xinyanggang, Jiangsu, China	Native	Artemisia halodendron	33.618	120.529	14.375		19.95	1.9			10.5
Gao et al., 2006	Xinyanggang, Jiangsu, China	Native	Phragmites australis	33.618	120.529	14.375		16.65	1.9			8.76316
Gao et al., 2006	Xinyanggang, Jiangsu, China	Non-native	Spartina alterniflora	33.618	120.529	14.375		11.25	1.7			6.61765
Genthner et al., 2013	Big Pine Key, Gulf of Mexico, USA	Native	Rhizophora mangle	24.6693	-81.3579	24.9417	441	10	0.8	51	1424	28
Genthner et al., 2013	Calhoun County, Gulf of Mexico, USA	Native	Avicennia germinans	28.2902	-96.5764	21.675	447	23	2.3	23	502	22
Genthner et al., 2013	Monroe Country, Gulf of Mexico, USA	Native	Avicennia germinans	24.9378	-80.6173	25	382	17	1.3	26	759	29
Genthner et al., 2013	Oyster Bay, Gulf of Mexico, USA	Native	Rhizophora mangle	25.3411	-81.0888	24.025	449	11	0.9	48	1289	27
Genthner et al., 2013	Rookery Bay, Gulf of Mexico, USA	Native	Rhizophora mangle	25.8939	-81.4599	23.4833	433	14	0.9	36	1243	34
Genthner et al., 2013	Whitewater Bay 1, Gulf of Mexico, USA	Native	Rhizophora mangle	25.2909	-80.9225	24.3	447	11	0.6	47	1925	41
Genthner et al., 2013	Whitewater Bay 2, Gulf of Mexico, USA	Native	Rhizophora mangle	25.2894	-80.943	24.2917	436	11		46
Genthner et al., 2013	Whitewater Bay 3, Gulf of Mexico, USA	Native	Laguncularia racemosa	25.1342	-81.024	24.5167	403	7	0.8	67	1301	19
González-Alcaraz et al., 2012	Marina del Carmolí, Spain	Native	Phragmites australis	37.695	-0.858611	18.2583		28.14	1.97			14.2843
González-Alcaraz et al., 2012	Marina del Carmolí, Spain	Native	Phragmites australis	37.695	-0.858611	18.2583		31.06	2.25			13.8044
Gorham & Gorham, 1955	Blakeney Point, Norfolk, England	Native	Aster tripolium	52.97	0.96			19
Gorham & Gorham, 1955	Blakeney Point, Norfolk, England	Native	Aster tripolium	52.97	0.96			14
Gorham & Gorham, 1955	Blakeney Point, Norfolk, England	Native	Limonium humile	52.97	0.96			23
Gorham & Gorham, 1955	Blakeney Point, Norfolk, England	Native	Limonium vulgare	52.97	0.96			20
Gorham & Gorham, 1955	Blakeney Point, Norfolk, England	Native	Salicornia stricta	52.97	0.96			17
Gorham & Gorham, 1955	Blakeney Point, Norfolk, England	Native	Salicornia stricta	52.97	0.96			13
Gorham & Gorham, 1955	Blakeney Point, Norfolk, England	Native	Salicornia stricta	52.97	0.96			16
Han, 2014	Chongming Island 1, China	Native	Phragmites australis	31.65	121.533	15.5167	409.6	10.9	2.3	40.2	294.7	7.6
Han, 2014	Chongming Island 1, China	Native	Scirpus × mariqueter	31.65	121.533	15.5167	291.2	10.3	3.4	30.9	149.6	5.1
Han, 2014	Chongming Island 1, China	Non-native	Spartina alterniflora	31.65	121.533	15.5167	368.9	8.2	1.6	51.6	256.7	5.3
He et al., 2002	Yingluo Bay 1, Guangxi, China	Native	Aegiceras corniculatum	21.4667	109.717	22.7333		15.16	0.91			16.6593
He et al., 2002	Yingluo Bay 1, Guangxi, China	Native	Avicennia marina	21.4667	109.717	22.7333		22.74	2.07			10.9855
He et al., 2002	Yingluo Bay 1, Guangxi, China	Native	Bruguiera gymnorhiza	21.4667	109.717	22.7333		12.67	0.94			13.4787
He et al., 2002	Yingluo Bay 1, Guangxi, China	Native	Kandelia candel	21.4667	109.717	22.7333		16.37	1.3			12.5923
He et al., 2002	Yingluo Bay 1, Guangxi, China	Native	Rhizophora stylosa	21.4667	109.717	22.7333		12.73	1.19			10.6975
Herbon & Nordhaus, 2013	Java, Indonesia	Native	Acanthus ilicifolius	-7.65	108.833	26.5417	395	10		39.8
Herbon & Nordhaus, 2013	Java, Indonesia	Native	Aegiceras corniculatum	-7.65	108.833	26.5417	490	7		76.6
Herbon & Nordhaus, 2013	Java, Indonesia	Native	Avicennia alba	-7.65	108.833	26.5417	420	7		58.8
Herbon & Nordhaus, 2013	Java, Indonesia	Native	Derris trifoliata	-7.65	108.833	26.5417	378	9		42.5
Herbon & Nordhaus, 2013	Java, Indonesia	Native	Rhizophora apiculata	-7.65	108.833	26.5417	444	6		83.7
Holmer & Olsen, 2002	Phuket Island, Thailand	Native	Enhalus acoroides	8.05	98.4167	28	218.8	32.8		12.4
Holmer & Olsen, 2002	Phuket Island, Thailand	Native	Rizophora apiculata	8.05	98.4167	28	348.1	4.7		86.4
Hou, 1982	Beidaihe, Hebei, China	Native	Artemisia scoparia	39.81	119.46	10.7167		21.9	2.45			8.93878
Hou, 1982	Beidaihe, Hebei, China	Native	Calystegia soldanella	39.81	119.46	10.7167		23.4	1.74			13.4483
Hou, 1982	Beidaihe, Hebei, China	Native	Carex kobomugi	39.81	119.46	10.7167		13.5	1.35			10
Hou, 1982	Beidaihe, Hebei, China	Native	Elymus mollis	39.81	119.46	10.7167		16	1.68			9.52381
Hou, 1982	Beidaihe, Hebei, China	Native	Glehnia littoralis	39.81	119.46	10.7167		15.9	3.42			4.64912
Hou, 1982	Beidaihe, Hebei, China	Native	Ixeris repens	39.81	119.46	10.7167		21.4	2.85			7.50877
Hou, 1982	Beidaihe, Hebei, China	Native	Lathyrus maritimus	39.81	119.46	10.7167		31.3	1.58			19.8101
Hou, 1982	Beidaihe, Hebei, China	Native	Limonium bicolor	39.81	119.46	10.7167		31.5	2.39			13.1799
Hou, 1982	Beidaihe, Hebei, China	Native	Messerschmidia argentea	39.81	119.46	10.7167		26.9	4.03			6.67494
Hou, 1982	Beidaihe, Hebei, China	Native	Phragmites australis	39.81	119.46	10.7167		19	1.65			11.5152
Hou, 1982	Beidaihe, Hebei, China	Native	Polygonum sibiricum	39.81	119.46	10.7167		25.7	1.91			13.4555
Hou, 1982	Beidaihe, Hebei, China	Native	Scorzonera mongolica var. putjatae	39.81	119.46	10.7167		23.4	2.13			10.9859
Hou, 1982	Beidaihe, Hebei, China	Native	Sophora flavescens	39.81	119.46	10.7167		32.8	2.07			15.8454
Hou, 1982	Beidaihe, Hebei, China	Native	Suaeda salsa	39.81	119.46	10.7167		20.5	2.02			10.1485
Hou, 1982	Beidaihe, Hebei, China	Native	Xanthium sibiricum	39.81	119.46	10.7167		21	2.33			9.01288
Hou, 1982	Beihai 2, Guangxi, China	Native	Cyperus malaccensis var. brevifolius	21.48	109.32	22.8917			0.3
Hou, 1982	Cangzhou, Hebei, China	Native	Aeluropus littoralis var. sinensis	38.41	117.63	12.7583		16.1	1.38			11.6667
Hou, 1982	Cangzhou, Hebei, China	Native	Scorzonera mongolica var. putjatae	38.41	117.63	12.7583		27.6	4.27			6.4637
Hou, 1982	Cangzhou, Hebei, China	Native	Tamarix juniperina	38.41	117.63	12.7583		26.1	2.39			10.9205
Hou, 1982	Changli, Hebei, China	Native	Limonium bicolor	39.57	119.24	10.925		31.7	2.65			11.9623
Hou, 1982	Changli, Hebei, China	Native	Limonium bicolor	39.57	119.24	10.925		33.9	3.1			10.9355
Hou, 1982	Changli, Hebei, China	Native	Phragmites australis	39.57	119.24	10.925		19.6	1.11			17.6577
Hou, 1982	Changli, Hebei, China	Native	Polygonum sibiricum	39.57	119.24	10.925		24.2	2.72			8.89706
Hou, 1982	Gaizhou, Liaoning, China	Native	Artemisia anethoides	40.39	122.25	9.43333		22.6	2.32			9.74138
Hou, 1982	Gaizhou, Liaoning, China	Non-native	Atriplex littoralis	40.39	122.25	9.43333		25.3	2.54			9.96063
Hou, 1982	Gaizhou, Liaoning, China	Native	Limonium bicolor	40.39	122.25	9.43333		10.7	0.84			12.7381
Hou, 1982	Gaizhou, Liaoning, China	Native	Limonium bicolor	40.39	122.25	9.43333		15.1	2			7.55
Hou, 1982	Gaizhou, Liaoning, China	Native	Limonium bicolor	40.39	122.25	9.43333		24.7	2.6			9.5
Hou, 1982	Gaizhou, Liaoning, China	Native	Limonium bicolor	40.39	122.25	9.43333		27.2	2.28			11.9298
Hou, 1982	Gaizhou, Liaoning, China	Native	Suaeda salsa	40.39	122.25	9.43333		19.1	2.22			8.6036
Hou, 1982	Guanyun, Jiangshu, China	Native	Suaeda glauca	34.49	119.7	13.8333		26.4	1.5			17.6
Hou, 1982	Guanyun, Jiangshu, China	Native	Suaeda salsa	34.49	119.7	13.8333		9.7	5.03			1.92843
Hou, 1982	Hepu, Guangxi, China	Native	Ipomoea pes-caprae	21.65	109.04	22.4417			3.51
Hou, 1982	Hepu, Guangxi, China	Native	Suaeda australis	21.65	109.04	22.4417		21	0.41			51.2195
Hou, 1982	Lianyungang, Jiangsu, China	Native	Artemisia scoparia	34.63	119.43	13.8333		27.7	3.21			8.62928
Hou, 1982	Lianyungang, Jiangsu, China	Non-native	Setaria lutescens	34.63	119.43	13.8333		13.8	2.5			5.52
Hou, 1982	Lianyungang, Jiangsu, China	Non-native	Setaria lutescens	34.63	119.43	13.8333		10.7	2.87			3.72822
Hou, 1982	Lianyungang, Jiangsu, China	Native	Xanthium sibiricum	34.63	119.43	13.8333		27	1.73			15.6069
Hou, 1982	Weizhou Island, Guangxi, China	Native	Vitex trifolia var. unifoliata	21.04	109.11	23.3083		13.3	2.67			4.98127
Hou, 1982	Weizhou Island, Guangxi, China	Native	Wedelia prostrata	21.04	109.11	23.3083		23.1	1.74			13.2759
Hou, 1982	Yancheng 2, Jiangshu, China	Native	Aeluropus littoralis var. sinensis	33.56	120.45	14.2333		16.3	1.79			9.10615
Hou, 1982	Yancheng 2, Jiangshu, China	Native	Lactuca tatarica	33.56	120.45	14.2333		22.6	1.78			12.6966
Hou, 1982	Yancheng 2, Jiangshu, China	Native	Limonium bicolor	33.56	120.45	14.2333		21.4	1.4			15.2857
Hou, 1982	Yancheng 2, Jiangshu, China	Native	Scorzonera mongolica var. putjatae	33.56	120.45	14.2333		24.3	5.54			4.38628
Hou, 1982	Yancheng 2, Jiangshu, China	Native	Suaeda salsa	33.56	120.45	14.2333		18.5	3.17			5.83596
Hou, 1982	Yancheng 2, Jiangshu, China	Native	Suaeda salsa	33.56	120.45	14.2333		11.8	1.63			7.23926
Hou, 1982	Yancheng 2, Jiangshu, China	Native	Suaeda salsa	33.56	120.45	14.2333		19.9	1.4			14.2143
Hou, 1982	Zhanjiang 1, Guangdong, China	Native	Suaeda australis	21.09	110.23	23.425		21.1	1.48			14.2568
Hunter et al., 2008	Northern Gulf of Mexico, Alabama, USA	Native	Distichlis spicata	30.3744	-88.3144	19.6417				55.3672	2091.65	37.7778
Hunter et al., 2008	Northern Gulf of Mexico, Alabama, USA	Native	Distichlis spicata	30.3744	-88.3144	19.6417				65.3107	2655.59	40.6609
Hunter et al., 2008	Northern Gulf of Mexico, Alabama, USA	Native	Salicornia bigelovii	30.3744	-88.3144	19.6417				31.5909	703.962	22.2837
Hunter et al., 2008	Northern Gulf of Mexico, Alabama, USA	Native	Salicornia bigelovii	30.3744	-88.3144	19.6417				31.8182	914.691	28.7474
Jia et al., 2018	Yellow River Delta 11, Shandong, China	Native	Phragmites australis	37.7667	119.167	12.1917	425	12.551	1.02041	30.7692	400	13.1409
Jia et al., 2018	Yellow River Delta 11, Shandong, China	Native	Suaeda salsa	37.7667	119.167	12.1917	285.714	12.8571	0.959184	20.5128	270.423	12.5432
Johnson et al., 2016	Plum Island Sound Estuary 1, Massachusetts, USA	Native	Distichlis spicata	42.733	-70.866	9.29167		12.3147
Johnson et al., 2016	Plum Island Sound Estuary 1, Massachusetts, USA	Native	Spartina alterniflora	42.733	-70.866	9.29167		14.2478
Johnson et al., 2016	Plum Island Sound Estuary 1, Massachusetts, USA	Native	Spartina alterniflora	42.733	-70.866	9.29167		10.3556
Johnson et al., 2016	Plum Island Sound Estuary 1, Massachusetts, USA	Native	Spartina patens	42.733	-70.866	9.29167		9.67458
Kao et al., 2002	Tamsui Esturary, Taiwan, China	Native	Kandelia candel	25.15	121.433	20.1417	432	19	2.4	23.4	180	7.91667
Kao et al., 2002	Tamsui Esturary, Taiwan, China	Native	Kandelia candel	25.15	121.433	20.1417	444	17	1.6	27.7	277.5	10.625
Langis et al., 1991	South San Diego Bay, USA	Native	Spartina folisa	32.6333	-117.1	17.6917		13.07	1.47			19.7
Li, 2013	Yancheng 1, Jiangsu, China	Native	Suaeda salsa	33.5167	120.367	14.2333	256.03	12.92	1.35	25.64	222.01	9.47
Li, 2017	Beilun Estuary, Guangxi, China	Native	Aegiceras corniculatum	21.5708	108.142	22.7	509.03	11.33	1.16	44.9276	438.819	9.76724
Li, 2017	Beilun Estuary, Guangxi, China	Native	Avicennia marina	21.5708	108.142	22.7	447.02	19.73	2.31	22.6569	193.515	8.54113
Li, 2017	Beilun Estuary, Guangxi, China	Native	Bruguiera gymnorhiza	21.5708	108.142	22.7	500.35	10.92	0.89	45.8196	562.191	12.2697
Li, 2017	Beilun Estuary, Guangxi, China	Native	Kandelia candel	21.5708	108.142	22.7	501.55	13.28	1.29	37.7673	388.798	10.2946
Li et al., 2008	Quanzhou Bay, Fujian, China	Native	Aegiceras corniculatum	24.8667	118.75	20.925		1.328	0.246			5.39837
Li et al., 2008	Quanzhou Bay, Fujian, China	Non-native	Alternanthera philoxeroides	24.8667	118.75	20.925		2.28	0.864			2.63889
Li et al., 2008	Quanzhou Bay, Fujian, China	Native	Alternanthera sessilis	24.8667	118.75	20.925		5.127	0.131			39.1374
Li et al., 2008	Quanzhou Bay, Fujian, China	Non-native	Basella alba	24.8667	118.75	20.925		5.143	0.121			42.5041
Li et al., 2008	Quanzhou Bay, Fujian, China	Native	Chenopodium album	24.8667	118.75	20.925		3.878	0.954			4.06499
Li et al., 2008	Quanzhou Bay, Fujian, China	Native	Limonium sinense	24.8667	118.75	20.925		3.313	0.569			5.8225
Li et al., 2008	Quanzhou Bay, Fujian, China	Native	Phragmites australis	24.8667	118.75	20.925		3.961	0.525			7.54476
Li et al., 2008	Quanzhou Bay, Fujian, China	Native	Solanum nigrum	24.8667	118.75	20.925		3.929	0.641			6.12949
Li et al., 2016	Tielu Harbour, Hainan, China	Native	Lumnitzera littorea	18.2667	109.717	25.625		9.32478	1.19691			7.79074
Li et al., 2016	Tielu Harbour, Hainan, China	Native	Lumnitzera racemosa	18.2667	109.717	25.625		9.46528	1.17346			8.06614
Lin & Lin, 1985	Jiulongjiang Estuary 5, Fujian,China	Native	Aegiceras corniculatum	24.4	117.917	20.9583		12.3	1.2			10.25
Lin & Lin, 1985	Jiulongjiang Estuary 5, Fujian,China	Native	Avicennia marina	24.4	117.917	20.9583		25.5	2.5			10.2
Lin & Lin, 1985	Jiulongjiang Estuary 5, Fujian,China	Native	Kandelia candel	24.4	117.917	20.9583		18.8	1.5			12.5333
Lin & Lobo Sternberg, 2007	Flamingo, South Florida, USA	Native	Rhizophora mangle	25.62	-80.07	24.2667		13.4501	0.288585			46.6071
Lin & Lobo Sternberg, 2007	Matheson Hammock Park, South Florida, USA	Native	Rhizophora mangle	25.68	-80.26	24.2667		14.8692	0.350123			42.4684
Lin & Lobo Sternberg, 2007	Matheson Hammock Park, South Florida, USA	Native	Rhizophora mangle	25.68	-80.26	24.2667		11.1796	0.190322			58.7405
Lin & Wang, 2001	Jiulongjiang Estuary 4, Fujian, China	Native	Bruguiera gymnorhiza	24.5667	117.917	20.9583		12.0419	1.3089			9.2
Lin & Wang, 2001	Jiulongjiang Estuary 4, Fujian, China	Native	Kandelia candel	24.5667	117.917	20.9583		15.9143	2.03955			7.80289
Lin & Wang, 2001	Jiulongjiang Estuary 4, Fujian, China	Native	Rhizophora stylosa	24.5667	117.917	20.9583		12.0481	1.72606			6.98015
Lin & Wu, 1990	Dongzhaigang 3, Hainan, China	Native	Aegiceras corniculatum	19.85	110.4	24.4917		15	1.2			12.5
Lin & Wu, 1990	Dongzhaigang 3, Hainan, China	Native	Bruguiera sexangula	19.85	110.4	24.4917		14.4	1.4			10.2857
Lin & Wu, 1990	Dongzhaigang 3, Hainan, China	Native	Ceriops tagal	19.85	110.4	24.4917		12.5	0.8			15.625
Liu, 2008	Shankou 2, Guangxi, China	Native	Avicennia marina	21.5333	109.733	22.675		17.1308	1.24384			13.98
Liu, 2008	Shankou 2, Guangxi, China	Native	Rhizophora stylosa	21.5333	109.733	22.675		9.0066	1.02536			8.74
Liu, 2008	Zhanjiang 2, Guangdong, China	Native	Rhizophora stylosa	21.5833	110.283	22.9667		10.4065	1.06753			9.76
Liu, 2013	Yellow River Delta 10, Shandong, China	Native	Phragmites australis	37.7394	119.138	12.9417	303	23.4	2.8	12.97	108.39	8.36
Liu, 2013	Yellow River Delta 5, Shandong, China	Native	Suaeda salsa	37.7311	119.229	12.275	236.5	16.7	2.6	14.17	90.96	6.42
Liu, 2013	Yellow River Delta 6, Shandong, China	Native	Suaeda glauca	37.7292	119.217	12.2667	223	12.1	2	18.49	81.55	4.41
Liu, 2013	Yellow River Delta 7, Shandong, China	Native	Phragmites australis	37.74	118.991	12.9	232.5	25.6	2.2	9.08	105.68	11.64
Liu, 2013	Yellow River Delta 8, Shandong, China	Native	Tamarix chinensis	37.7481	119.092	12.925	344.7	18.1	2.8	19.04	125.26	6.58
Liu, 2013	Yellow River Delta 9, Shandong, China	Non-native	Imperata cylindrica	37.7564	119.001	12.8	591.5	11.6	1.7	50.9	347.65	6.83
Liu, 2014	Jiaozhou Bay 1, China	Native	Phragmites australis	36.2	120.133	12.9917	514.689	32.1927	3.85874	19.2615	369.097	19.548
Liu, 2014	Jiaozhou Bay 1, China	Non-native	Spartina anglica	36.2	120.133	12.9917	368.692	12.3176	4.16274	35.0242	235.098	6.74473
Liu, 2014	Jiaozhou Bay 1, China	Native	Suaeda glauca	36.2	120.133	12.9917	358.079	10.8914	1.97843	39.0181	492.475	12.9041
Liu et al., 2008a	Jiuduansha, Changjiang Estuary, China	Native	Scirpus × mariqueter	31.1694	121.967	15.7		8.2584	1.47804			5.67178
Liu et al., 2008b	Jiuduansha, Changjiang Estuary, China	Native	Phragmites australis	31.1694	121.967	15.7		19.0431	1.93857			9.8116
Liu et al., 2008b	Jiuduansha, Changjiang Estuary, China	Native	Scirpus × mariqueter	31.1694	121.967	15.7		10.7777	1.53448			7.08611
Liu et al., 2008b	Jiuduansha, Changjiang Estuary, China	Non-native	Spartina alterniflora	31.1694	121.967	15.7		8.12212	1.55689			5.37925
Liu et al., 2015	Yellow River Delta 3, Shandong, China	Native	Suaeda salsa	37.9167	118.967	13.0167	270.46	17.34	0.86	15.5975	314.488	20.1628
Liu et al., 2015	Yellow River Delta 3, Shandong, China	Native	Suaeda salsa	37.9167	118.967	13.0167	288.55	18.52	1.46	15.5805	197.637	12.6849
Liu et al., 2017	Shuangtaizi Estuary 1, Liaoning, China	Native	Suaeda heteroptera	40.933	121.783	9.15	281	12.6667		22.2183
Lovelock et al., 2004	Bocas del Toro archipelago, Eastern Panamá	Native	Rhizophora mangle	9.35	-82.25		484	12.1	0.7	40	704	17.6
Lugo et al., 2007	Jobos Bay, Puerto Rico	Native	Avicennia germinans	17.96	-66.21	26.6167		19.9531	0.910957			21.9035
Lugo et al., 2007	Jobos Bay, Puerto Rico	Native	Laguncularia racemosa	17.96	-66.21	26.6167		9.78019	0.777037			12.5865
Lugo et al., 2007	Jobos Bay, Puerto Rico	Native	Rhizophora mangle	17.96	-66.21	26.6167		15.8065	0.523723			30.181
Lugo et al., 2007	Jobos Bay, Puerto Rico	Native	Rhizophora mangle	17.96	-66.21	26.6167		6.63121	0.467657			14.1796
Luo et al., 2010	Shuangtaizi Estuary 2, Liaoning, China	Native	Phragmites australis	41.0167	121.9	9.23333		15.5104	1.74999			8.8631
Luo et al., 2010	Shuangtaizi Estuary 2, Liaoning, China	Native	Phragmites australis	41.0167	121.9	9.23333		16.9527	1.88357			9.00028
Luo et al., 2010	Shuangtaizi Estuary 2, Liaoning, China	Native	Phragmites australis	41.0167	121.9	9.23333		9.00888	1.43021			6.299
Luo et al., 2010	Shuangtaizi Estuary 2, Liaoning, China	Native	Phragmites australis	41.0167	121.9	9.23333		10.9172	0.749697			14.5621
Luo et al., 2010	Shuangtaizi Estuary 2, Liaoning, China	Native	Phragmites australis	41.0167	121.9	9.23333		11.7382	0.973229			12.0611
Madi et al., 2016	Antonina, Paraná, Brazil	Native	Avicennia schaueriana	-25.4833	-48.7	20.525		25.9	1.95			13.2821
Madi et al., 2016	Antonina, Paraná, Brazil	Native	Laguncularia racemosa	-25.4833	-48.7	20.525		13.5	1.6			8.4375
Madi et al., 2016	Antonina, Paraná, Brazil	Native	Rhizophora mangle	-25.4833	-48.7	20.525		18.16	1.37			13.2555
Madi et al., 2016	Guaratuba, Paraná, Brazil	Native	Avicennia schaueriana	-25.8333	-48.5667	19.725		22.23	1.63			13.638
Madi et al., 2016	Guaratuba, Paraná, Brazil	Native	Laguncularia racemosa	-25.8333	-48.5667	19.725		13.3	1.34			9.92537
Madi et al., 2016	Guaratuba, Paraná, Brazil	Native	Rhizophora mangle	-25.8333	-48.5667	19.725		18.89	1.36			13.8897
McKee et al., 2002	Twin Cays 2, Belize	Native	Rhizophora mangle	16.8333	-88.1			9.317	0.603427			15.4401
McKee et al., 2002	Twin Cays 2, Belize	Native	Rhizophora mangle	16.8333	-88.1			9.10906	0.506753			17.9754
McKee et al., 2002	Twin Cays 2, Belize	Native	Rhizophora mangle	16.8333	-88.1			9.70992	0.402866			24.1021
Medina et al., 2010	Los Machos, Eastern Puerto Rico	Native	Rhizophora mangle	18.245	-65.6156	26.3333		13.6747	0.712358			19.1964
Medina et al., 2010	Los Machos, Eastern Puerto Rico	Native	Rhizophora mangle	18.245	-65.6156	26.3333		10.5379	0.596678			17.661
Medina et al., 2010	Los Machos, Eastern Puerto Rico	Native	Rhizophora mangle	18.245	-65.6156	26.3333		11.7735	0.486201			24.2154
Medina et al., 2010	Los Machos, Eastern Puerto Rico	Native	Rhizophora mangle	18.245	-65.6156	26.3333		10.3895	0.483248			21.4993
Medina et al., 2010	Los Machos, Eastern Puerto Rico	Native	Rhizophora mangle	18.245	-65.6156	26.3333		10.0877	0.469626			21.4802
Medina et al., 2015	Las Peonías lagoon, Venezuela	Native	Laguncularia racemosa	10.7333	-71.6333	27.95	420.155	14.5428	1.10657	28.8909	379.692	13.1423
Medina et al., 2015	Las Peonías lagoon, Venezuela	Native	Rhizophora mangle	10.7333	-71.6333	27.95	448.354	17.285	0.945491	25.9389	474.202	18.2815
Mendelssohn, 1979	Oak Island Marsh, North Carolina, USA	Native	Spartina alterniflora	33.9	-78.03	17.8		12.1138
Mendelssohn, 1979	Oak Island Marsh, North Carolina, USA	Native	Spartina alterniflora	33.9	-78.03	17.8		11.4756
Mendelssohn, 1979	Oak Island Marsh, North Carolina, USA	Native	Spartina alterniflora	33.9	-78.03	17.8		12.882
Méndez-Alongzo et al., 2008	Agua Dulce, Mexico	Native	Avicennia germinans	18.1833	-94.1	26	436	25.2	1.3	17.3016	335.385	19.3846
Méndez-Alongzo et al., 2008	Barra Galindo, Mexico	Native	Avicennia germinans	20.75	-97.2167	24.1917	445	26.6	1.5	16.7293	296.667	17.7333
Méndez-Alongzo et al., 2008	El Llano, Mexico	Native	Avicennia germinans	19.4667	-96.3333	25.025	446	26.2	1.3	17.0229	343.077	20.1538
Méndez-Alongzo et al., 2008	El Ostion, Mexico	Native	Avicennia germinans	18.1833	-94.6833	26.0083	432	28.3	1.2	15.265	360	23.5833
Méndez-Alongzo et al., 2008	La Mancha, Mexico	Native	Avicennia germinans	19.35	-96.3		427	27.3	1.2	15.641	355.833	22.75
Méndez-Alongzo et al., 2008	La Pesca, Mexico	Native	Avicennia germinans	23.45	-97.7667	23.475	472	26.1	1.3	18.0843	363.077	20.0769
Méndez-Alongzo et al., 2008	Sontecomapan, Mexico	Native	Avicennia germinans	18.5333	-95.0167	25.8333	433	28.6	1.1	15.1399	393.636	26
Méndez-Alongzo et al., 2008	Tamiahua, Mexico	Native	Avicennia germinans	21.4	-97.5		460	27	1.5	17.037	306.667	18
Méndez-Alongzo et al., 2008	Tampico, Mexico	Native	Avicennia germinans	22.1333	-97.8167	23.7083	469	28	1.4	16.75	335	20
Mendoza et al., 2012	Caeté River Estuary, Brazil	Native	Avicennia germinans	-0.934722	-46.6692	26.35			1.05
Mendoza et al., 2012	Caeté River Estuary, Brazil	Native	Avicennia germinans	-0.934722	-46.6692	26.35			1.1
Mendoza et al., 2012	Caeté River Estuary, Brazil	Native	Avicennia germinans	-0.934722	-46.6692	26.35			1.16
Mendoza et al., 2012	Caeté River Estuary, Brazil	Native	Rhizophora mangle	-0.934722	-46.6692	26.35			1.23
Mendoza et al., 2012	Caeté River Estuary, Brazil	Native	Rhizophora mangle	-0.934722	-46.6692	26.35			1.4
Mendoza et al., 2012	Caeté River Estuary, Brazil	Native	Rhizophora mangle	-0.934722	-46.6692	26.35			1.4
Minden & Kleyer, 2014	Island of Mellum, Germany	Native	Aster tripolium	53.716	8.15	8.79167	331.1	16.75	1.95	19.7672	169.795	8.58974
Minden & Kleyer, 2014	Island of Mellum, Germany	Native	Atriplex portulacoides	53.716	8.15	8.79167	379.8	17.77	1.7	21.3731	223.412	10.4529
Minden & Kleyer, 2014	Island of Mellum, Germany	Native	Festuca rubra	53.716	8.15	8.79167	423.9	12.27	1.54	34.5477	275.26	7.96753
Minden & Kleyer, 2014	Island of Mellum, Germany	Native	Glaux maritima	53.716	8.15	8.79167	392.5	16.6	1.49	23.6446	263.423	11.1409
Minden & Kleyer, 2014	Island of Mellum, Germany	Native	Limonium vulgare	53.716	8.15	8.79167	400	18.77	1.32	21.3106	303.03	14.2197
Minden & Kleyer, 2014	Island of Mellum, Germany	Native	Plantago maritima	53.716	8.15	8.79167	348.4	11.05	1.42	31.5294	245.352	7.78169
Minden & Kleyer, 2014	Island of Mellum, Germany	Native	Puccinellia maritima	53.716	8.15	8.79167	391.7	14.23	2.03	27.5264	192.956	7.00985
Minden & Kleyer, 2014	Island of Mellum, Germany	Non-native	Spartina anglica	53.716	8.15	8.79167	418.5	15.06	1.91	27.7888	219.11	7.88482
Minden & Kleyer, 2014	Island of Mellum, Germany	Native	Spergularia media	53.716	8.15	8.79167	334.9	14.43	1.34	23.2086	249.925	10.7687
Minden & Kleyer, 2014	Island of Mellum, Germany	Native	Suaeda maritima	53.716	8.15	8.79167	295.5	10.7	0.72	27.6168	410.417	14.8611
Minden & Kleyer, 2014	Island of Mellum, Germany	Native	Triglochin maritima	53.716	8.15	8.79167	380.1	25.58	2.21	14.8593	171.991	11.5747
Minden & Kleyer, 2014	Mainland Lower Saxony, Germany	Native	Artemisia maritima	53.533	7.533	9	466.9	17.83	4.29	26.1862	108.834	4.15618
Minden & Kleyer, 2014	Mainland Lower Saxony, Germany	Native	Aster tripolium	53.533	7.533	9	429.9	23.74	2.23	18.1087	192.78	10.6457
Minden & Kleyer, 2014	Mainland Lower Saxony, Germany	Native	Atriplex littoralis	53.533	7.533	9	382.2	19.44	1.78	19.6605	214.719	10.9213
Minden & Kleyer, 2014	Mainland Lower Saxony, Germany	Native	Atriplex portulacoides	53.533	7.533	9	377.1	17.95	1.94	21.0084	194.381	9.25258
Minden & Kleyer, 2014	Mainland Lower Saxony, Germany	Native	Atriplex prostrata	53.533	7.533	9	389.8	18.26	1.71	21.3472	227.953	10.6784
Minden & Kleyer, 2014	Mainland Lower Saxony, Germany	Native	Elymus athericus	53.533	7.533	9	457.5	15.35	1.32	29.8046	346.591	11.6288
Minden & Kleyer, 2014	Mainland Lower Saxony, Germany	Native	Limonium vulgare	53.533	7.533	9	416.5	23.01	1.74	18.1008	239.368	13.2241
Minden & Kleyer, 2014	Mainland Lower Saxony, Germany	Native	Plantago maritima	53.533	7.533	9	361	14.88	1.4	24.2608	257.857	10.6286
Minden & Kleyer, 2014	Mainland Lower Saxony, Germany	Native	Salicornia europaea	53.533	7.533	9	371.8	19.27	2.34	19.2942	158.889	8.23504
Minden & Kleyer, 2014	Mainland Lower Saxony, Germany	Non-native	Spartina anglica	53.533	7.533	9	432.4	22.85	2.48	18.9234	174.355	9.21371
Minden & Kleyer, 2014	Mainland Lower Saxony, Germany	Native	Suaeda maritima	53.533	7.533	9	349.9	18.4	2.17	19.0163	161.244	8.47926
Minden & Kleyer, 2014	Mainland Lower Saxony, Germany	Native	Triglochin maritima	53.533	7.533	9	384.7	22.11	2.45	17.3994	157.02	9.02449
Morrisey et al., 2003	Manukau Harbour, New Zealand	Native	Avicennia marina var. australasica	-37.01	174.82	15.1917		18.8	1.8			10.4444
Mou, 2007	Dongzhaigang 2, Hainan, China	Native	Aegiceras corniculatum	19.9333	110.717	24.3333		13.34
Mou, 2007	Dongzhaigang 2, Hainan, China	Native	Avicennia marina	19.9333	110.717	24.3333		22.86
Mou, 2007	Dongzhaigang 2, Hainan, China	Native	Bruguiera gymnorhiza	19.9333	110.717	24.3333		14.11
Mou, 2007	Dongzhaigang 2, Hainan, China	Native	Bruguiera sexangula	19.9333	110.717	24.3333		13.19
Mou, 2007	Dongzhaigang 2, Hainan, China	Native	Bruguiera sexangula var. rhynchopetala	19.9333	110.717	24.3333		13.92
Mou, 2007	Dongzhaigang 2, Hainan, China	Native	Ceriops tagal	19.9333	110.717	24.3333		8.46
Mou, 2007	Dongzhaigang 2, Hainan, China	Native	Clerodendrum inerme	19.9333	110.717	24.3333		24.48
Mou, 2007	Dongzhaigang 2, Hainan, China	Native	Kandelia candel	19.9333	110.717	24.3333		18.96
Mou, 2007	Dongzhaigang 2, Hainan, China	Native	Rhizophora apiculata	19.9333	110.717	24.3333		12.13
Mou, 2007	Dongzhaigang 2, Hainan, China	Native	Rhizophora stylosa	19.9333	110.717	24.3333		14.22
Mou, 2007	Dongzhaigang 2, Hainan, China	Native	Sonneratia × gulngai	19.9333	110.717	24.3333		24.99
Mou, 2007	Dongzhaigang 2, Hainan, China	Native	Sonneratia alba	19.9333	110.717	24.3333		30.89
Mou, 2007	Dongzhaigang 2, Hainan, China	Native	Sonneratia caseolaris	19.9333	110.717	24.3333		26.66
Mou, 2007	Dongzhaigang 2, Hainan, China	Native	Sonneratia ovata	19.9333	110.717	24.3333		13
Mou, 2007	Dongzhaigang 2, Hainan, China	Native	Thespesia populnea	19.9333	110.717	24.3333		14.93
Mou, 2007	Qinglan Bay 2, Hainan, China	Native	Acanthus ebracteatus	19.4667	110.733	24.625		18.93
Mou, 2007	Qinglan Bay 2, Hainan, China	Native	Acanthus ilicifolius	19.4667	110.733	24.625		21.96
Mou, 2007	Qinglan Bay 2, Hainan, China	Native	Acrostichum aureum	19.4667	110.733	24.625		16.14
Mou, 2007	Qinglan Bay 2, Hainan, China	Native	Acrostichum speciosum	19.4667	110.733	24.625		22.24
Mou, 2007	Qinglan Bay 2, Hainan, China	Native	Barringtonia racemosa	19.4667	110.733	24.625		23.69
Mou, 2007	Qinglan Bay 2, Hainan, China	Native	Cerbera manghas	19.4667	110.733	24.625		29.78
Mou, 2007	Qinglan Bay 2, Hainan, China	Native	Dolichandrone cauda-felina	19.4667	110.733	24.625		30.04
Mou, 2007	Qinglan Bay 2, Hainan, China	Native	Excoecaria agallocha	19.4667	110.733	24.625		23.14
Mou, 2007	Qinglan Bay 2, Hainan, China	Native	Heritiera littoralis	19.4667	110.733	24.625		16.68
Mou, 2007	Qinglan Bay 2, Hainan, China	Native	Hernandia nymphaeifolia	19.4667	110.733	24.625		33.19
Mou, 2007	Qinglan Bay 2, Hainan, China	Native	Hibiscus tiliaceus	19.4667	110.733	24.625		24.94
Mou, 2007	Qinglan Bay 2, Hainan, China	Native	Lumnitzera racemosa	19.4667	110.733	24.625		14.03
Mou, 2007	Qinglan Bay 2, Hainan, China	Native	Pemphis acidula	19.4667	110.733	24.625		14.08
Mou, 2007	Qinglan Bay 2, Hainan, China	Native	Pongamia pinnata	19.4667	110.733	24.625		36.07
Mou, 2007	Qinglan Bay 2, Hainan, China	Native	Scyphiphora hydrophyllacea	19.4667	110.733	24.625		10.06
Mou, 2007	Qinglan Bay 2, Hainan, China	Native	Sonneratia × hainanensis	19.4667	110.733	24.625		18.96
Mou, 2007	Qinglan Bay 2, Hainan, China	Native	Xylocarpus granatum	19.4667	110.733	24.625		24.82
Mou, 2007	Tielu Harbour, Hainan, China	Native	Lumnitzera littorea	18.25	109.7	25.625		9.46
Muzuka & Shunula, 2006	Bagamoyo, Eastern Tanzania	Native	Avicennia marina	-6.41383	39.4132	26.4	468.761	6.58303		71.2074
Muzuka & Shunula, 2006	Bagamoyo, Eastern Tanzania	Native	Bruguiera gymnorhiza	-6.41383	39.4132	26.4	495.783	2.95185		167.957
Muzuka & Shunula, 2006	Bagamoyo, Eastern Tanzania	Native	Ceriops tagal	-6.41383	39.4132	26.4	423.076	2.8176		150.155
Muzuka & Shunula, 2006	Bagamoyo, Eastern Tanzania	Native	Lumnitzera racemosa	-6.41383	39.4132	26.4	524.061	3.41963		153.251
Muzuka & Shunula, 2006	Bagamoyo, Eastern Tanzania	Native	Rhizophora mucronata	-6.41383	39.4132	26.4	325.495	3.28546		99.0712
Muzuka & Shunula, 2006	Bagamoyo, Eastern Tanzania	Native	Sonneratia alba	-6.41383	39.4132	26.4	486.709	8.85673		54.9536
Muzuka & Shunula, 2006	Kisakasaka, Eastern Tanzania	Native	Avicennia marina	-6.41367	39.4137	26.4	521.686	8.21973		63.4675
Muzuka & Shunula, 2006	Kisakasaka, Eastern Tanzania	Native	Bruguiera gymnorhiza	-6.41367	39.4137	26.4	531.749	3.65436		145.511
Muzuka & Shunula, 2006	Kisakasaka, Eastern Tanzania	Native	Ceriops tagal	-6.41367	39.4137	26.4	535.442	3.56593		150.155
Muzuka & Shunula, 2006	Kisakasaka, Eastern Tanzania	Native	Heritiera littoralis	-6.41367	39.4137	26.4	399.108	3.63132		109.907
Muzuka & Shunula, 2006	Kisakasaka, Eastern Tanzania	Native	Lumnitzera racemosa	-6.41367	39.4137	26.4	547.256	7.76984		70.4334
Muzuka & Shunula, 2006	Kisakasaka, Eastern Tanzania	Native	Pemphis acidula	-6.41367	39.4137	26.4	575.14	10.4659		54.9536
Muzuka & Shunula, 2006	Kisakasaka, Eastern Tanzania	Native	Rhizophora mucronata	-6.41367	39.4137	26.4	393.682	3.94293		99.8452
Muzuka & Shunula, 2006	Kisakasaka, Eastern Tanzania	Native	Sonneratia alba	-6.41367	39.4137	26.4	514.478	2.74672		187.306
Muzuka & Shunula, 2006	Kisakasaka, Eastern Tanzania	Native	Xylocarpus granatum	-6.41367	39.4137	26.4	347.866	5.76209		60.3715
Neves et al., 2007	Castro Marim, Southern Portugal	Native	Atriplex portulacoides	37.2167	-7.43333	17.875		14.5919	1.05328			13.8538
Neves et al., 2007	Castro Marim, Southern Portugal	Native	Limoniastrum monopetalum	37.2167	-7.43333	17.875		15.369	1.16803			13.158
Ngai & Jefferies, 2004	La Pérouse Bay 2, Manitoba, Canada	Native	Carex subspathacea	58.7167	-94.4333	-6.875				18.8	405.61	21.88
Ngai & Jefferies, 2004	La Pérouse Bay 2, Manitoba, Canada	Native	Chrysanthemum arcticum	58.7167	-94.4333	-6.875				17.46	218.99	12.64
Ngai & Jefferies, 2004	La Pérouse Bay 2, Manitoba, Canada	Native	Plantago juncoides	58.7167	-94.4333	-6.875				18.64	322.08	16.95
Ngai & Jefferies, 2004	La Pérouse Bay 2, Manitoba, Canada	Native	Potentilla egedii	58.7167	-94.4333	-6.875				19.71	316.2	15.98
Ngai & Jefferies, 2004	La Pérouse Bay 2, Manitoba, Canada	Native	Potentilla palustris	58.7167	-94.4333	-6.875				15.32	239.36	15.52
Ngai & Jefferies, 2004	La Pérouse Bay 2, Manitoba, Canada	Native	Puccinellia phryganodes	58.7167	-94.4333	-6.875		16.8153	2.41302	23.38	430.98	18.57
Ngai & Jefferies, 2004	La Pérouse Bay 2, Manitoba, Canada	Native	Ranunculus cymbalaria	58.7167	-94.4333	-6.875				10.51	171.57	16
Ngai & Jefferies, 2004	La Pérouse Bay 2, Manitoba, Canada	Native	Salicornia borealis	58.7167	-94.4333	-6.875				10.7	150.26	14.11
Ngai & Jefferies, 2004	La Pérouse Bay 2, Manitoba, Canada	Native	Senecio congestus	58.7167	-94.4333	-6.875				18.33	288.13	16.11
Ngai & Jefferies, 2004	La Pérouse Bay 2, Manitoba, Canada	Native	Triglochin palustris	58.7167	-94.4333	-6.875				16.03	460.81	27.32
Nirmal Kumar et al., 2011	Narmada Estuary, India	Native	Avicennia marina	21.5	72.7333	27.2167		11.72	1.33			8.81203
Nordhaus et al., 2011	The Segara Anakan, Java, Indonesia	Native	Aegiceras corniculatum	-7.7	108.9	26.2583	469	13		36.9
Nordhaus et al., 2011	The Segara Anakan, Java, Indonesia	Native	Avicennia alba	-7.7	108.9	26.2583	442	22		20
Nordhaus et al., 2011	The Segara Anakan, Java, Indonesia	Native	Ceriops decandra	-7.7	108.9	26.2583	482	11		42.3
Nordhaus et al., 2011	The Segara Anakan, Java, Indonesia	Native	Rhizophora apiculata	-7.7	108.9	26.2583	441	15		30.3
Nordhaus et al., 2011	The Segara Anakan, Java, Indonesia	Native	Sonneratia caseolaris	-7.7	108.9	26.2583	421	19		22.8
Osgood & Zieman, 1993	Hog Island Bay, Virginia, USA	Native	Spartina alterniflora	37.43	-75.69	14.7	407	14	2.3	29.0714	176.957	6.08696
Osgood & Zieman, 1993	Hog Island Bay, Virginia, USA	Native	Spartina alterniflora	37.43	-75.69	14.7	406	14	1.6	29	253.75	8.75
Osgood & Zieman, 1993	Hog Island Bay, Virginia, USA	Native	Spartina alterniflora	37.43	-75.69	14.7	414	13	1.7	31.8462	243.529	7.64706
Osgood & Zieman, 1993	Hog Island Bay, Virginia, USA	Native	Spartina alterniflora	37.43	-75.69	14.7	408	15	1.6	27.2	255	9.375
Osgood & Zieman, 1993	Hog Island Bay, Virginia, USA	Native	Spartina alterniflora	37.43	-75.69	14.7	418	14	2	29.8571	209	7
Osgood & Zieman, 1993	Hog Island Bay, Virginia, USA	Native	Spartina alterniflora	37.43	-75.69	14.7	411	18	1.9	22.8333	216.316	9.47368
Osgood & Zieman, 1993	Hog Island Bay, Virginia, USA	Native	Spartina alterniflora	37.43	-75.69	14.7	418	15	1.9	27.8667	220	7.89474
Osgood & Zieman, 1993	Hog Island Bay, Virginia, USA	Native	Spartina alterniflora	37.43	-75.69	14.7	415	21	2.3	19.7619	180.435	9.13043
Page, 1995	Carpinteria 2, California, USA	Native	Salicornia virginica	34.4	-119.525	15		19.9264
Page, 1995	Carpinteria 2, California, USA	Native	Salicornia virginica	34.4	-119.525	15		15.0842
Page, 1995	Carpinteria 2, California, USA	Native	Salicornia virginica	34.4	-119.525	15		16.3122
Page, 1995	Carpinteria 2, California, USA	Native	Salicornia virginica	34.4	-119.525	15		17.5755
Popp et al., 1984	Bateman's Bay, New South Wales, Australia	Native	Aegiceras corniculatum	-35.7	150.14	16.125		10.8
Popp et al., 1984	Bateman's Bay, New South Wales, Australia	Native	Avicennia marina	-35.7	150.14	16.125		19.3
Popp et al., 1984	Hinchibrook Island 2, Northern Queensland, Australia	Native	Acanthus ilicifolius	-18.25	146.15	23.9917		16.7
Popp et al., 1984	Hinchibrook Island 2, Northern Queensland, Australia	Native	Aegialitis annulata	-18.25	146.15	23.9917		18
Popp et al., 1984	Hinchibrook Island 2, Northern Queensland, Australia	Native	Avicennia eucalyptifolia	-18.25	146.15	23.9917		13.6
Popp et al., 1984	Hinchibrook Island 2, Northern Queensland, Australia	Native	Bruguiera exaristata	-18.25	146.15	23.9917		8.9
Popp et al., 1984	Hinchibrook Island 2, Northern Queensland, Australia	Native	Bruguiera gymnorhiza	-18.25	146.15	23.9917		6.3
Popp et al., 1984	Hinchibrook Island 2, Northern Queensland, Australia	Native	Ceriops tagal v. australis	-18.25	146.15	23.9917		9.8
Popp et al., 1984	Hinchibrook Island 2, Northern Queensland, Australia	Native	Excoecaria agallocha	-18.25	146.15	23.9917		6.2
Popp et al., 1984	Hinchibrook Island 2, Northern Queensland, Australia	Native	Heritiera littoralis	-18.25	146.15	23.9917		17.2
Popp et al., 1984	Hinchibrook Island 2, Northern Queensland, Australia	Native	Hibiscus tiliaceus	-18.25	146.15	23.9917		23.6
Popp et al., 1984	Hinchibrook Island 2, Northern Queensland, Australia	Native	Lumnitzera littorea	-18.25	146.15	23.9917		9
Popp et al., 1984	Hinchibrook Island 2, Northern Queensland, Australia	Native	Lumnitzera racemosa	-18.25	146.15	23.9917		6.9
Popp et al., 1984	Hinchibrook Island 2, Northern Queensland, Australia	Native	Osbornia octodonta	-18.25	146.15	23.9917		11
Popp et al., 1984	Hinchibrook Island 2, Northern Queensland, Australia	Native	Rhizophora apiculata	-18.25	146.15	23.9917		8.4
Popp et al., 1984	Hinchibrook Island 2, Northern Queensland, Australia	Native	Rhizophora lamarckii	-18.25	146.15	23.9917		7.5
Popp et al., 1984	Hinchibrook Island 2, Northern Queensland, Australia	Native	Rhizophora stylosa	-18.25	146.15	23.9917		6.3
Popp et al., 1984	Hinchibrook Island 2, Northern Queensland, Australia	Native	Scyphiphora hydrophyllacea	-18.25	146.15	23.9917		13.6
Popp et al., 1984	Hinchibrook Island 2, Northern Queensland, Australia	Native	Sonneratia alba	-18.25	146.15	23.9917		11.4
Popp et al., 1984	Hinchibrook Island 2, Northern Queensland, Australia	Native	Xylocarpus granatum	-18.25	146.15	23.9917		11.9
Qiao et al., 2018	Dafeng Milu National Nature Reserve, Jiangsu, China	Non-native	Spartina alterniflora	33.05	120.85	15.0667	410.876	12.3218	1.78794	33.366	236.585	7.07373
Qin et al., 1988	Luoyuan, Fujian, China	Non-native	Spartina alterniflora	26.5667	119.617	17.775		8.2542	2.6914			3.06688
Qin et al., 1988	Luoyuan, Fujian, China	Non-native	Spartina alterniflora	26.5667	119.617	17.775		8.66284	2.67007			3.24443
Qin et al., 1988	Luoyuan, Fujian, China	Non-native	Spartina alterniflora	26.5667	119.617	17.775		7.56118	2.46774			3.06401
Qu et al., 2017	Chenier Island in Yellow River Delta, China	Native	Phragmites australis	37.9833	117.85	13.0583	454	18.85	0.978	24.0849	464.213	19.274
Qu et al., 2017	Chenier Island in Yellow River Delta, China	Native	Phragmites australis	37.9833	117.85	13.0583	483	21.56	0.72	22.4026	670.833	29.9444
Qu et al., 2017	Chenier Island in Yellow River Delta, China	Native	Suaeda heteroptera	37.9833	117.85	13.0583	386	11.11	0.828	34.7435	466.184	13.4179
Qu et al., 2017	Chenier Island in Yellow River Delta, China	Native	Suaeda heteroptera	37.9833	117.85	13.0583	388	20.37	2.16	19.0476	179.63	9.43056
Qu et al., 2018	Yellow River Delta 2, Shandong, China	Native	Phragmites australis	37.7833	119.183	12.175				78.2	1752	22.4
Ramos e Silva et al., 2007	Potengi Estuary, Northern Brazil	Native	Rhizophora mangle	-5.75	-35.2	26.0333		8.43	1.76			4.78977
Rao et al., 1994	Gazi Bay, Mombasa, Kenya	Native	Avicennia marina	-4.426	39.512	26.2417	443	19		27
Rao et al., 1994	Gazi Bay, Mombasa, Kenya	Native	Avicennia marina	-4.426	39.512	26.2417	391	17		28
Rao et al., 1994	Gazi Bay, Mombasa, Kenya	Native	Bruguiera gymnorhiza	-4.426	39.512	26.2417	456	8		70
Rao et al., 1994	Gazi Bay, Mombasa, Kenya	Native	Ceriops tagal	-4.426	39.512	26.2417	443	8		69
Rao et al., 1994	Gazi Bay, Mombasa, Kenya	Native	Heritiera littoralis	-4.426	39.512	26.2417	505	25		24
Rao et al., 1994	Gazi Bay, Mombasa, Kenya	Native	Lumnitzera racemosa	-4.426	39.512	26.2417	392	12		39
Rao et al., 1994	Gazi Bay, Mombasa, Kenya	Native	Rhizophora mucronata	-4.426	39.512	26.2417	448	7		78
Rao et al., 1994	Gazi Bay, Mombasa, Kenya	Native	Sonneratia alba	-4.426	39.512	26.2417	339	12		34
Rao et al., 1994	Gazi Bay, Mombasa, Kenya	Native	Xylocarpus granatum	-4.426	39.512	26.2417	408	12		39
Ray et al., 2014	Sundarbans Mangrove, East India	Native	Aegialitis rotundifolia	21.5333	88.8333			1
Ray et al., 2014	Sundarbans Mangrove, East India	Native	Avicennia alba	21.5333	88.8333			18
Reis et al., 2017	The Cardoso Island State Park, Brazil	Native	Avicennia schaueriana	-21.133	47.963	22.45	417.4	13.8	1.8	26.3	231.889	7.8
Reis et al., 2017	The Cardoso Island State Park, Brazil	Native	Laguncularia racemosa	-21.133	47.963	22.45	415.9	16.3	1.3	30.9	319.923	13.3
Reis et al., 2017	The Cardoso Island State Park, Brazil	Native	Rhizophora mangle	-21.133	47.963	22.45	412.3	15.3	1.1	27.9	374.818	14.6
Rong et al., 2015	Laizhou Bay, China	Native	Tamarix chinensis	37.1333	119.383	12	443.785	24.77	1.385	18.16	328.7	18.205
Ruess et al., 1989	La Pérouse Bay 1, Manitoba, Canada	Native	Calamagrostis deschampsioides	58.0667	-94.05	-6.30833	416	20.5		20.6
Ruess et al., 1989	La Pérouse Bay 1, Manitoba, Canada	Native	Carex subspathacea	58.0667	-94.05	-6.30833	441	25.2		18.3
Ruess et al., 1989	La Pérouse Bay 1, Manitoba, Canada	Native	Puccinellia phryganodes	58.0667	-94.05	-6.30833	432	27.1		16.7
Scharler et al., 2015	Twin Cays 4, Belize	Native	Rhizophora mangle	16.8333	-88.1					46.7	1570.2	33.6
Scharler et al., 2015	Twin Cays 4, Belize	Native	Rhizophora mangle	16.8333	-88.1					45.2	1537	34
Scharler et al., 2015	Twin Cays 4, Belize	Native	Rhizophora mangle	16.8333	-88.1					45.4	2136.5	47.1
Shao et al., 2013	Hangzhou Bay 2, Zhejiang, China	Native	Phragmites australis	30.309	121.089	16.25	447.545	8.77021	0.456147	51.0301	981.142	19.2267
Shao et al., 2013	Hangzhou Bay 2, Zhejiang, China	Native	Scirpus × mariqueter	30.309	121.089	16.25	421.875	11.0762	1.35486	38.0883	311.379	8.17519
Shao et al., 2013	Hangzhou Bay 2, Zhejiang, China	Non-native	Spartina alterniflora	30.309	121.089	16.25	440.29	5.30654	0.693167	82.9712	635.187	7.65551
Shen, 2016	Beihai 3, Guangxi, China	Native	Aegiceras corniculatum	21.48	109.75	22.9917		10.33	0.83			12.4
Shen, 2016	Beihai 3, Guangxi, China	Native	Avicennia marina	21.48	109.75	22.9917		20.7	1.62			12.83
Shen, 2016	Beihai 3, Guangxi, China	Native	Bruguiera gymnorhiza	21.48	109.75	22.9917		12.2	0.95			12.81
Shen, 2016	Beihai 3, Guangxi, China	Native	Cerbera manghas	21.48	109.75	22.9917		17.13	1.8			9.83
Shen, 2016	Beihai 3, Guangxi, China	Native	Excoecaria agallocha	21.48	109.75	22.9917		19.7	1.76			11.26
Shen, 2016	Beihai 3, Guangxi, China	Native	Kandelia candel	21.48	109.75	22.9917		10.8	1.09			9.99
Shen, 2016	Beihai 3, Guangxi, China	Native	Lumnitzera racemosa	21.48	109.75	22.9917		13.37	1.22			10.96
Shen, 2016	Beihai 3, Guangxi, China	Native	Pongamia pinnata	21.48	109.75	22.9917		33.3	1.93			17.25
Shen, 2016	Beihai 3, Guangxi, China	Native	Rhizophora stylosa	21.48	109.75	22.9917		11.2	1.18			9.5
Shen, 2016	Beihai 3, Guangxi, China	Non-native	Sonneratia apetala	21.48	109.75	22.9917		15.7	1.66			9.49
Shen, 2016	Beihai 3, Guangxi, China	Native	Thespesia populnea	21.48	109.75	22.9917		33.03	2.98			11.38
Shen, 2016	Wenchang, Hainan, China	Native	Aegiceras corniculatum	19.61	110.84	22		10.33	0.83			12.45
Shen, 2016	Wenchang, Hainan, China	Native	Bruguiera sexangula	19.61	110.84	22		14.05	1.57			8.95
Shen, 2016	Wenchang, Hainan, China	Native	Dolichandrone cauda-felina	19.61	110.84	22		34.1	2.02			16.88
Shen, 2016	Wenchang, Hainan, China	Native	Heritiera littoralis	19.61	110.84	22		21.61	1.76			12.28
Shen, 2016	Wenchang, Hainan, China	Native	Hibiscus tiliaceus	19.61	110.84	22		24.29	1.85			13.13
Shen, 2016	Wenchang, Hainan, China	Native	Lumnitzera racemosa	19.61	110.84	22		14.16	1.3			10.89
Shen, 2016	Wenchang, Hainan, China	Native	Sonneratia alba	19.61	110.84	22		29.12	1.9			15.33
Shen, 2016	Wenchang, Hainan, China	Native	Sonneratia caseolaris	19.61	110.84	22		26.02	3.24			8.03
Shen, 2016	Wenchang, Hainan, China	Native	Xylocarpus granatum	19.61	110.84	22		21.89	1.35			16.21
Spain & Holt, 1980	Tributary of Bohle River, Australia	Native	Aegiceras corniculatum	-19.2	146.683	24.125		8.5	1			8.5
Spain & Holt, 1980	Tributary of Bohle River, Australia	Native	Avicennia marina	-19.2	146.683	24.125		17.6	1.6			11
Spain & Holt, 1980	Tributary of Bohle River, Australia	Native	Ceriops tagal	-19.2	146.683	24.125		8.6	0.9			9.55556
Spain & Holt, 1980	Tributary of Bohle River, Australia	Native	Excoecaria agallocha	-19.2	146.683	24.125		11.9	2.1			5.66667
Spain & Holt, 1980	Tributary of Bohle River, Australia	Native	Osbornia octodonta	-19.2	146.683	24.125		15.9	1.6			9.9375
Spain & Holt, 1980	Tributary of Bohle River, Australia	Native	Rhizophora stylosa	-19.2	146.683	24.125		7.8	1			7.8
Spain & Holt, 1980	Tributary of Bohle River, Australia	Native	Xylocarpus australasicus	-19.2	146.683	24.125		18.5	1.8			10.2778
Sun et al., 2016	Gaoqiao, Guangdong, China	Native	Myoporum bontioides	21.5667	110.167	22.9667	401.936	15.525		25.8895
Sun et al., 2016	Longhai, Fujiang, China	Native	Myoporum bontioides	22.3833	117.917		395.95	16.583		23.8769
Sun et al., 2016	Quanzhou, Fujiang, China	Native	Myoporum bontioides	24.3833	118.967	20.925	388.052	16.6466		23.3112
Sun et al., 2016	Shankou 1, Guangxi, China	Native	Myoporum bontioides	21.4833	109.767	22.975	394.952	15.3738		25.69
Sun et al., 2016	Ximen Island, Zhejiang, China	Native	Myoporum bontioides	28.0333	121.183	17.2083	401.021	13.934		28.7801
Sun et al., 2016	Zhangpu, Fujiang, China	Native	Myoporum bontioides	23.7167	117.4	21.3167	396.948	16.8774		23.5195
Tam et al., 1995	Futian 2, Shenzhen, China	Native	Aegiceras corniculatum	22.52	114	22.8417	423.885	13.3399	1.22766	31.7756	345.279	10.8662
Tam et al., 1995	Futian 2, Shenzhen, China	Native	Aegiceras corniculatum	22.52	114	22.8417	440.294	13.1758	1.61188	33.417	273.156	8.17418
Tam et al., 1995	Futian 2, Shenzhen, China	Native	Kandelia candel	22.52	114	22.8417	443.47	13.2985	1.335	33.3475	332.187	9.96139
Tam et al., 1995	Futian 2, Shenzhen, China	Native	Kandelia candel	22.52	114	22.8417	407.045	14.4718	1.35	28.1268	301.515	10.7198
Tobias et al., 2014	Louisiana's Coastal Marshes, USA	Native	Spartina alterniflora	29.3175	-91.1746	20.5417	549.824	14.2	1.3	38.72	422.942	10.9231
Tobias et al., 2014	Louisiana's Coastal Marshes, USA	Native	Spartina patens	29.3175	-91.1746	20.5417	614.822	10.7	0.9	57.46	683.136	11.8889
Tran et al., 2017	Mangawhai Harbour Estuary, New Zealand	Native	Avicennia marina var. australasica	-36.1167	174.6	15.3	434.3	21	2.5	20.681	173.72	8.4
Vivanco et al., 2015	Carpinteria 1, California, USA	Native	Salicornia virginica	34.4008	-119.536	15	329	24.7		13.3198
Vivanco et al., 2015	Morro Bay, California, USA	Native	Salicornia virginica	35.3333	-120.831	15	321	22.4		14.3304
Vivanco et al., 2015	Tijuana, California, USA	Native	Salicornia virginica	32.5497	-117.123	18	303	20.3		14.9261
Wang & Lin, 2001	Jiulongjiang Estuary 2, Fujian, China	Native	Kandelia candel	24.4	117.917	20.9583		13.6569	1.3117			10.414
Wang & Lin, 2001	Jiulongjiang Estuary 2, Fujian, China	Native	Rhizophora stylosa	24.4	117.917	20.9583		11.0705	1.42632			7.76137
Wang, 2007	Yellow River Delta 4, Shandong, China	Native	Scorzonera mongolica	37.9167	118.967	13.0167			1.07865
Wang, 2007	Yellow River Delta 4, Shandong, China	Native	Tamarix chinensis	37.9167	118.967	13.0167			0.781
Wang, 2014	Chongming Island 2, China	Native	Phragmites australis	31.608	121.67	15.5833	418.765	15.6	1.26125	26.8439	332.022	12.5192
Wang et al., 2003	Jiulongjiang Estuary 1, Fujian, China	Native	Kandelia candel	24.5667	117.917	20.9583		13.6	1.32			10.303
Wang et al., 2011	Qinglan Bay 1, Hainan, China	Native	Acanthus ebracteatus	19.4833	110.733	24.625		18.93
Wang et al., 2011	Qinglan Bay 1, Hainan, China	Native	Acanthus ilicifolius	19.4833	110.733	24.625		21.96
Wang et al., 2011	Qinglan Bay 1, Hainan, China	Native	Acrostichum aureum	19.4833	110.733	24.625		16.14
Wang et al., 2011	Qinglan Bay 1, Hainan, China	Native	Acrostichum speciosum	19.4833	110.733	24.625		22.24
Wang et al., 2011	Qinglan Bay 1, Hainan, China	Native	Aegiceras corniculatum	19.4833	110.733	24.625		13.35
Wang et al., 2011	Qinglan Bay 1, Hainan, China	Native	Avicennia marina	19.4833	110.733	24.625		22.86
Wang et al., 2011	Qinglan Bay 1, Hainan, China	Native	Barringtonia racemosa	19.4833	110.733	24.625		23.69
Wang et al., 2011	Qinglan Bay 1, Hainan, China	Native	Bruguiera × rhynchopetala	19.4833	110.733	24.625		13.92
Wang et al., 2011	Qinglan Bay 1, Hainan, China	Native	Bruguiera gymnorhiza	19.4833	110.733	24.625		14.11
Wang et al., 2011	Qinglan Bay 1, Hainan, China	Native	Bruguiera sexangula	19.4833	110.733	24.625		13.19
Wang et al., 2011	Qinglan Bay 1, Hainan, China	Native	Cerbera manghas	19.4833	110.733	24.625		29.78
Wang et al., 2011	Qinglan Bay 1, Hainan, China	Native	Ceriops tagal	19.4833	110.733	24.625		8.56
Wang et al., 2011	Qinglan Bay 1, Hainan, China	Native	Clerodendrum inerme	19.4833	110.733	24.625		24.48
Wang et al., 2011	Qinglan Bay 1, Hainan, China	Native	Dolichandrone spathacea	19.4833	110.733	24.625		30.04
Wang et al., 2011	Qinglan Bay 1, Hainan, China	Native	Excoecaria agallocha	19.4833	110.733	24.625		23.14
Wang et al., 2011	Qinglan Bay 1, Hainan, China	Native	Heritiera littoralis	19.4833	110.733	24.625		16.68
Wang et al., 2011	Qinglan Bay 1, Hainan, China	Native	Hernandia nymphaeifolia	19.4833	110.733	24.625		33.19
Wang et al., 2011	Qinglan Bay 1, Hainan, China	Native	Hibiscus tiliaceus	19.4833	110.733	24.625		25.95
Wang et al., 2011	Qinglan Bay 1, Hainan, China	Native	Kandelia obovata	19.4833	110.733	24.625		18.96
Wang et al., 2011	Qinglan Bay 1, Hainan, China	Native	Lumnitzera littorea	19.4833	110.733	24.625		9.56
Wang et al., 2011	Qinglan Bay 1, Hainan, China	Native	Lumnitzera racemosa	19.4833	110.733	24.625		14.03
Wang et al., 2011	Qinglan Bay 1, Hainan, China	Native	Pemphis acidula	19.4833	110.733	24.625		14.08
Wang et al., 2011	Qinglan Bay 1, Hainan, China	Native	Pongamia pinnata	19.4833	110.733	24.625		36.07
Wang et al., 2011	Qinglan Bay 1, Hainan, China	Native	Rhizophora apiculata	19.4833	110.733	24.625		12.13
Wang et al., 2011	Qinglan Bay 1, Hainan, China	Native	Rhizophora stylosa	19.4833	110.733	24.625		14.22
Wang et al., 2011	Qinglan Bay 1, Hainan, China	Native	Scyphiphora hydrophyllacea	19.4833	110.733	24.625		10.06
Wang et al., 2011	Qinglan Bay 1, Hainan, China	Native	Sonneratia × gulngai	19.4833	110.733	24.625		24.99
Wang et al., 2011	Qinglan Bay 1, Hainan, China	Native	Sonneratia × hainanensis	19.4833	110.733	24.625		18.96
Wang et al., 2011	Qinglan Bay 1, Hainan, China	Native	Sonneratia alba	19.4833	110.733	24.625		30.89
Wang et al., 2011	Qinglan Bay 1, Hainan, China	Native	Sonneratia caseolaris	19.4833	110.733	24.625		26.66
Wang et al., 2011	Qinglan Bay 1, Hainan, China	Native	Sonneratia ovata	19.4833	110.733	24.625		13
Wang et al., 2011	Qinglan Bay 1, Hainan, China	Native	Thespesia populnea	19.4833	110.733	24.625		15.93
Wang et al., 2011	Qinglan Bay 1, Hainan, China	Native	Xylocarpus granatum	19.4833	110.733	24.625		24.82
Wang et al., 2015	Shanyuan 1, Minjiang River Estuary, Fujian, China	Native	Cyperus malaccensis	26.0333	119.617	20.0833	410	20.4	2.1	20.6	206	9.9
Wang et al., 2015	Shanyuan 1, Minjiang River Estuary, Fujian, China	Native	Phragmites australis	26.0333	119.617	20.0833	420	30	1.7	14.6	264	18
Wang et al., 2015	Shanyuan 2, Minjiang River Estuary, Fujian, China	Native	Cyperus malaccensis var. brevifolius	26.0333	119.617	20.0833	396	12.09	1.9	32.7543	208.421	6.36316
Wang et al., 2015	Shanyuan 2, Minjiang River Estuary, Fujian, China	Non-native	Spartina alterniflora	26.0333	119.617	20.0833	406.8	17.49	1.15	23.259	353.739	15.2087
Wang et al., 2018	Shanyuan 3, Minjiang River Estuary, Fujian, China	Native	Cyperus malaccensis var. brevifolius	26.0333	119.55	19.7417	377.8	12	3.1	31.4	123.82	3.94
Wang et al., 2018	Shanyuan 3, Minjiang River Estuary, Fujian, China	Native	Cyperus malaccensis var. brevifolius	26.0333	119.55	19.7417	383.5	10.8	2.3	35.9	228.59	6.08
Wang et al., 2018	Shanyuan 3, Minjiang River Estuary, Fujian, China	Native	Cyperus malaccensis var. brevifolius	26.0333	119.55	19.7417	377.5	9.9	1.6	38.58	278.07	7.61
Wei et al., 2015	Yingluo Bay 3, Guangxi, China	Native	Avicennia marina	21.5333	109.667	22.6667		17.19	1.24			13.98
Weiss et al., 2016	Indonesia	Native	Acanthus ilicifolius	-0.383333	122.05	27.2083				18.8
Weiss et al., 2016	Indonesia	Native	Aegiceras corniculatum	-0.383333	122.05	27.2083				70
Weiss et al., 2016	Indonesia	Native	Bruguiera parviflora	-0.383333	122.05	27.2083				81.2
Weiss et al., 2016	Indonesia	Native	Bruguiera sexangula	-0.383333	122.05	27.2083				51.9
Weiss et al., 2016	Indonesia	Native	Derris trifoliata	-0.383333	122.05	27.2083				19.3
Weiss et al., 2016	Indonesia	Native	Nypa fruticans	-0.383333	122.05	27.2083				52.9
Weiss et al., 2016	Indonesia	Native	Rhizophora apiculata	-0.383333	122.05	27.2083				36.9
Weiss et al., 2016	Indonesia	Native	Rhizophora stylosa	-0.383333	122.05	27.2083				54.1
Weiss et al., 2016	Indonesia	Native	Sonneratia alba	-0.383333	122.05	27.2083				32.6
Weiss et al., 2016	Indonesia	Native	Xylocarpus granatum	-0.383333	122.05	27.2083				41.3
Wen, 1987	Beibuwan, Guangxi, China	Native	Aegiceras corniculatum	21.66	108.53	22.25		14.451	1.608			8.98694
Wen, 1987	Beibuwan, Guangxi, China	Native	Avicennia marina	21.66	108.53	22.25		22.36	2.073			10.7863
Wen, 1987	Beibuwan, Guangxi, China	Native	Bruguiera gymnorhiza	21.66	108.53	22.25		11.896	0.873			13.6266
Wen, 1987	Beibuwan, Guangxi, China	Native	Cyperus malaccensis	21.66	108.53	22.25		9.71	1.369			7.09277
Wen, 1987	Beibuwan, Guangxi, China	Native	Excoecaria agallocha	21.66	108.53	22.25		20.532	1.775			11.5673
Wen, 1987	Beibuwan, Guangxi, China	Native	Kandelia candel	21.66	108.53	22.25		15.141	1.31			11.558
Wen, 1987	Beibuwan, Guangxi, China	Native	Rhizophora stylosa	21.66	108.53	22.25		11.571	1.052			10.999
Wen, 1987	Beibuwan, Guangxi, China	Non-native	Spartina anglica	21.66	108.53	22.25		12.012	1.395			8.61075
Werth et al., 2015	Biological Station of La Mancha,Veracruz, Mexico	Native	Acrostichum aureum	19.6	-96.3778	24.925	397	18		21.9
Werth et al., 2015	Biological Station of La Mancha,Veracruz, Mexico	Native	Acrostichum danaeifolium	19.6	-96.3778	24.925	401	23		17.3
Whigham et al., 2009	Indian River Lagoon,Florida, USA	Native	Avicennia germinans	27.55	-80.55	22.7167		15.7
Whiting et al., 1987	The North Inlet Salt Marsh, South Carolina, USA	Native	Spartina alterniflora	33.3638	-79.2265	18.1083		17
Williamson et al., 2014	Gulf of Mexico, Louisiana, USA	Native	Spartina alterniflora	29.58	-91.99	20.4417	436	11.8	1.18	32.3	369.492	10.6
Wolters et al., 2016	Phang Nga Bay, Thailand	Native	Rhizophora apiculata	8.23	98.43	27.0583	414.9	10.5		41.27
Wolters et al., 2016	Phang Nga Bay, Thailand	Native	Rhizophora apiculata	8.23	98.43	27.0583	417.9	9.5		44.37
Wolters et al., 2016	Phang Nga Bay, Thailand	Native	Rhizophora apiculata	8.23	98.43	27.0583	411.8	11.1		37.96
Wolters et al., 2016	Phang Nga Bay, Thailand	Native	Rhizophora apiculata	8.23	98.43	27.0583	423.5	10.1		42.33
Wolters et al., 2016	Phang Nga Bay, Thailand	Native	Rhizophora apiculata	8.23	98.43	27.0583	421.7	9.4		46.19
Wolters et al., 2016	Phang Nga Bay, Thailand	Native	Rhizophora apiculata	8.23	98.43	27.0583	422.5	9.1		48.19
Wolters et al., 2016	Phang Nga Bay, Thailand	Native	Rhizophora apiculata	8.23	98.43	27.0583	421.5	9		49.36
Wolters et al., 2016	Phang Nga Bay, Thailand	Native	Rhizophora apiculata	8.23	98.43	27.0583	420.2	10.8		39.76
Woodroffe, 1988	Darwin Harbour, Australia	Native	Avicennia marina	-12.4333	130.867	27.55		13	1.7			7.64706
Woodroffe, 1988	Darwin Harbour, Australia	Native	Bruguiera exaristata	-12.4333	130.867	27.55		10	0.8			12.5
Woodroffe, 1988	Darwin Harbour, Australia	Native	Bruguiera parviflora	-12.4333	130.867	27.55		8	0.7			11.4286
Woodroffe, 1988	Darwin Harbour, Australia	Native	Ceriops tagal	-12.4333	130.867	27.55		8	0.6			13.3333
Woodroffe, 1988	Darwin Harbour, Australia	Native	Rhizophora stylosa	-12.4333	130.867	27.55		12	0.9			13.3333
Wooler et al., 2003	Hutchinson Island, Florida, USA	Native	Laguncularia racemosa	27.55	-80.3333	22.7667	462	9		55.7
Wooler et al., 2003	Man of War Cay, Belize	Native	Avicennia germinans	16.8667	-88.0833		523	20		31.7
Wooler et al., 2003	Man of War Cay, Belize	Native	Laguncularia racemosa	16.8667	-88.0833		484	12		45.6
Wooler et al., 2003	Man of War Cay, Belize	Native	Laguncularia racemosa	16.8667	-88.0833		511	19		32.2
Wooler et al., 2003	Man of War Cay, Belize	Native	Rhizophora mangle	16.8667	-88.0833		511	15		39.7
Wooler et al., 2003	Twin Cays 1, Belize	Native	Laguncularia racemosa	16.8333	-88.1		468	12		46.5
Wooler et al., 2003	Twin Cays 1, Belize	Native	Laguncularia racemosa	16.8333	-88.1		403	4		116.1
Wooler et al., 2003	Twin Cays 1, Belize	Native	Laguncularia racemosa	16.8333	-88.1		446	10		51.2
Wooler et al., 2003	Twin Cays 1, Belize	Native	Laguncularia racemosa	16.8333	-88.1		360	4		112.6
Wooler et al., 2003	Twin Cays 1, Belize	Native	Laguncularia racemosa	16.8333	-88.1		456	5		106.2
Wooler et al., 2003	Twin Cays 1, Belize	Native	Laguncularia racemosa	16.8333	-88.1		438	8		62.8
Wooler et al., 2003	Twin Cays 1, Belize	Native	Laguncularia racemosa	16.8333	-88.1		457	8		68.1
Wooler et al., 2003	Twin Cays 1, Belize	Native	Laguncularia racemosa	16.8333	-88.1		466	8		71.2
Wu et al., 2012	Dongzhaigang and Wenchang, Hainan, China	Native	Acanthus ilicifolius	19.7	110.733	24.4583		33.0224	1.42446			23.5334
Wu et al., 2012	Dongzhaigang and Wenchang, Hainan, China	Native	Acrostichum speciosum	19.7	110.733	24.4583		22.0721	1.92816			12.2367
Wu et al., 2012	Dongzhaigang and Wenchang, Hainan, China	Native	Aegiceras corniculatum	19.7	110.733	24.4583		11.8802	1.21719			10.6099
Wu et al., 2012	Dongzhaigang and Wenchang, Hainan, China	Native	Avicennia marina	19.7	110.733	24.4583		23.0094	1.81668			13.4647
Wu et al., 2012	Dongzhaigang and Wenchang, Hainan, China	Native	Bruguiera gymnorhiza	19.7	110.733	24.4583		15.52	0.984231			15.225
Wu et al., 2012	Dongzhaigang and Wenchang, Hainan, China	Native	Ceriops tagal	19.7	110.733	24.4583		8.69857	0.680207			12.4018
Wu et al., 2012	Dongzhaigang and Wenchang, Hainan, China	Native	Clerodendrum inerme	19.7	110.733	24.4583		24.4834	1.94336			12.433
Wu et al., 2012	Dongzhaigang and Wenchang, Hainan, China	Native	Dolichandrone cauda-felina	19.7	110.733	24.4583		17.4385	1.74352			13.5638
Wu et al., 2012	Dongzhaigang and Wenchang, Hainan, China	Native	Excoecaria agallocha	19.7	110.733	24.4583		31.6705	1.98711			16.2276
Wu et al., 2012	Dongzhaigang and Wenchang, Hainan, China	Native	Heritiera littoralis	19.7	110.733	24.4583		16.6734	1.21608			13.3766
Wu et al., 2012	Dongzhaigang and Wenchang, Hainan, China	Native	Hibiscus tiliaceus	19.7	110.733	24.4583		25.5677	1.69413			15.2099
Wu et al., 2012	Dongzhaigang and Wenchang, Hainan, China	Native	Lumnitzera racemosa	19.7	110.733	24.4583		14.1902	1.00361			14.691
Wu et al., 2012	Dongzhaigang and Wenchang, Hainan, China	Native	Pemphis acidula	19.7	110.733	24.4583		14.5676	0.858852			17.0727
Wu et al., 2012	Dongzhaigang and Wenchang, Hainan, China	Native	Pluchea indica	19.7	110.733	24.4583		29.9482	4.37646			6.99948
Wu et al., 2012	Dongzhaigang and Wenchang, Hainan, China	Native	Rhizophora apiculata	19.7	110.733	24.4583		12.4656	0.743832			16.845
Wu et al., 2012	Dongzhaigang and Wenchang, Hainan, China	Native	Scyphiphora hydrophyllacea	19.7	110.733	24.4583		10.2697	0.678558			15.1082
Wu et al., 2012	Dongzhaigang and Wenchang, Hainan, China	Native	Sonneratia × gulngai	19.7	110.733	24.4583		24.8965	2.28432			11.1459
Wu et al., 2012	Dongzhaigang and Wenchang, Hainan, China	Native	Sonneratia × hainanensis	19.7	110.733	24.4583		18.9983	1.17874			16.4646
Wu et al., 2012	Dongzhaigang and Wenchang, Hainan, China	Native	Sonneratia alba	19.7	110.733	24.4583		17.4577	1.59317			11.3688
Wu et al., 2012	Dongzhaigang and Wenchang, Hainan, China	Native	Sonneratia caseolaris	19.7	110.733	24.4583		21.3276	3.28886			7.91918
Wu et al., 2012	Dongzhaigang and Wenchang, Hainan, China	Native	Sonneratia ovata	19.7	110.733	24.4583		13.1045	1.50698			9.18741
Wu et al., 2012	Dongzhaigang and Wenchang, Hainan, China	Native	Thespesia populnea	19.7	110.733	24.4583		15.9059	1.92241			8.53959
Wu et al., 2012	Dongzhaigang and Wenchang, Hainan, China	Native	Xylocarpus granatum	19.7	110.733	24.4583		21.3134	1.37073			16.3673
Wu, Wu, Liu et al., 2010	Hangzhou Bay 1, Zhejiang, China	Native	Carex scabrirostris	30.3111	121.145	16.25		10.2533	0.643333			15.07
Wu, Wu, Liu et al., 2010	Hangzhou Bay 1, Zhejiang, China	Native	Phragmites australis	30.3111	121.145	16.25		11.0133	0.63			16.67
Wu, Wu, Liu et al., 2010	Hangzhou Bay 1, Zhejiang, China	Native	Scirpus × mariqueter	30.3111	121.145	16.25		11.0533	0.813333			14.5667
Wu, Wu, Liu et al., 2010	Hangzhou Bay 1, Zhejiang, China	Native	Phragmites australis	30.3111	121.145	16.25		10.4293	0.592593			17.8666
Yan et al., 2006	Chongming Dongtan, China	Native	Carex scabrirostris	31.5	121.75	15.5833		11.101
Yan et al., 2006	Chongming Dongtan, China	Native	Phragmites australis	31.5	121.75	15.5833		14.1098
Yan et al., 2006	Chongming Dongtan, China	Native	Scirpus × mariqueter	31.5	121.75	15.5833		14.886
Yan et al., 2006	Chongming Dongtan, China	Non-native	Spartina alterniflora	31.5	121.75	15.5833		6.6803
Yang et al., 2016	Yancheng Wetland National Nature Reserve 1, Jiangsu, China	Native	Phragmites australis	33.6	120.6	14.5583				46.93
Yang et al., 2016	Yancheng Wetland National Nature Reserve 1, Jiangsu, China	Non-native	Spartina alterniflora	33.6	120.6	14.5583				47.6
Yang et al., 2016	Yancheng Wetland National Nature Reserve 1, Jiangsu, China	Native	Suaeda salsa	33.6	120.6	14.5583				54.62
Yang et al., 2017	Yancheng Wetland National Nature Reserve 2, Jiangsu, China	Non-native	Spartina alterniflora	30.6	120.617	16.05				44.92
Yang et al., 2017	Yancheng Wetland National Nature Reserve 2, Jiangsu, China	Non-native	Spartina alterniflora	30.6	120.617	16.05				47.59
Yang et al., 2017	Yancheng Wetland National Nature Reserve 2, Jiangsu, China	Non-native	Spartina alterniflora	30.6	120.617	16.05				55.34
Yang et al., 2017	Yancheng Wetland National Nature Reserve 2, Jiangsu, China	Non-native	Spartina alterniflora	30.6	120.617	16.05				46.67
Yin & Lin, 1993	Yingluo Bay 4, Guangxi, China	Native	Rhizophora stylosa	21.4667	109.717	22.7333		19	1.4			13.5714
Zan, 2013	Jiaozhou Bay 2, China	Native	Phragmites australis	36.2	120.2	12.9917	362.246	20.9684	2.021	17.2472	183.193	11.0231
Zan et al., 2002	Futian 3, Shenzhen, China	Native	Kandelia candel	22.5333	114.05	22.8417		19.784	1.796			11.0156
Zan et al., 2002	Futian 3, Shenzhen, China	Non-native	Sonneratia apetala	22.5333	114.05	22.8417		17.896	1.932			9.26294
Zan et al., 2002	Futian 3, Shenzhen, China	Native	Sonneratia caseolaris	22.5333	114.05	22.8417		27.948	2.675			10.4479
Zeng et al., 2008	Beihai 1,Guangxi,China	Native	Avicennia marina	21.4333	109.233	22.9333		20.45	1.42			14.41
Zeng et al., 2008	Beihai 1,Guangxi,China	Native	Avicennia marina	21.4333	109.233	22.9333		22.25	1.31			16.97
Zeng et al., 2009	Minjiang River Estuary 1, China	Native	Phragmites australis	26.0333	119.633	20.0833		26.4	1.3			20.3077
Zeng et al., 2009	Minjiang River Estuary 1,China	Non-native	Spartina alterniflora	26.0333	119.633	20.0833		16.8	1.6			10.5
Zhang & Song, 1996	Futian 1, Shenzhen, China	Native	Aegiceras corniculatum	22.5333	114.083	22.8917		10.96	1.126			9.73357
Zhang & Song, 1996	Futian 1, Shenzhen, China	Native	Avicennia marina	22.5333	114.083	22.8917		26.42	2.463			10.7268
Zhang & Song, 1996	Futian 1, Shenzhen, China	Native	Kandelia candel	22.5333	114.083	22.8917		11.81	1.19			9.92437
Zhang & Song, 1996	Taiping, Guangdong, China	Native	Aegiceras corniculatum	22.7667	113.733	22.525		12.81	1.203			10.6484
Zhang et al., 2009	Minjiang River Estuary 2, China	Native	Phragmites australis	26.0333	119.633	20.0833		23.3314	1.28426	16.28	325.78	18.78
Zhang et al., 2009	Minjiang River Estuary 2, China	Non-native	Spartina alterniflora	26.0333	119.633	20.0833		13.5344	1.10291	24.53	252.89	9.52
Zhang et al., 2010	Wanggang Wetland, China	Non-native	Spartina alterniflora	33.15	120.783	15.0417				32.9
Zhang et al., 2010	Wanggang Wetland, China	Native	Suaeda salsa	33.15	120.783	15.0417				27.6
Zhang et al., 2012	Fulong Bay, Guangdong, China	Native	Hibiscus tiliaceus	20.9333	110.15	23.5583		20.9	2.7			7.74074
Zhang et al., 2013	Lagoon near Mazatlan, Mexico	Native	Avicennia germinans	23.15	-106.333	24.7333		8.6
Zhang et al., 2013	Lagoon near Mazatlan, Mexico	Native	Avicennia germinans	23.15	-106.333	24.7333		10
Zhang et al., 2013	Lagoon near Mazatlan, Mexico	Native	Rhizophora mangle	23.15	-106.333	24.7333		9.6
Zhang et al., 2015	Yellow River Delta 1, Shandong, China	Native	Phragmites australis	37.9167	118.967	13.0167		11.7876	1.089			11.0683
Zhang et al., 2015	Yellow River Delta 1, Shandong, China	Native	Suaeda salsa	37.9167	118.967	13.0167		7.36283	0.886956			8.55727
Zhang et al., 2015	Yellow River Delta 1, Shandong, China	Native	Tamarix chinensis	37.9167	118.967	13.0167		14.1947	1.53003			9.54846
Zhang, S., 2016	Dongying, China	Native	Phragmites australis	37.9167	118.967	13.0167		25.437	1.30478			23.4043
Zhang, S., 2016	Dongying, China	Native	Suaeda salsa	37.9167	118.967	13.0167		15.1968	1.11617			13.7541
Zhang, S., 2016	Tianjing, China	Native	Phragmites australis	38.89	117.67	12.1		17.156	2.10092			8.23553
Zhang, S., 2016	Tianjing, China	Native	Suaeda salsa	38.89	117.67	12.1		23.4931	2.85182			8.31581
Zhang, X.-N., 2016	Tielu Harbour, Hainan, China	Native	Lumnitzera littorea	18.25	109.7	25.625		9.28846	1.19452			7.77589
Zhang, X.-N., 2016	Tielu Harbour, Hainan, China	Native	Lumnitzera racemosa	18.25	109.7	25.625		9.63653	1.16438			8.27607
Zhen et al., 1995	Jiulongjiang Estuary 6, Fujian, China	Native	Kandelia candel	24.4	117.917	20.9583	449.7	18		24.9833
Zhou et al., 2006	Changjiang Estuary, China	Native	Carex scabrifolia	31.4167	121.883	15.7	434	7.3		59.8
Zhou et al., 2006	Changjiang Estuary, China	Native	Scirpus × mariqueter	31.4167	121.883	15.7	451	11.3		39.9
Zhou et al., 2006	Changjiang Estuary, China	Native	Scirpus tabernaemontani	31.4167	121.883	15.7	392	12.8		30.7
Zhou et al., 2006	Changjiang Estuary, China	Native	Scirpus triqueter	31.4167	121.883	15.7	430	11		39.3
Zhou et al., 2007	Yangtze Estuary, China	Native	Scirpus × mariqueter	31.4167	121.883		430	11		39.3
Zhou et al., 2007	Yangtze Estuary, China	Native	Scirpus triqueter	31.4167	121.883		451	7.6	1.1	59.3	410	6.90909
Zhou et al., 2010	Zhangjiang River Estuary, Fujian, China	Native	Avicennia marina	23.9167	117.4	21.325		21.5012	3.37002			6.44121
Zhu, 2017	Fujian, China	Native	Cyperus malaccensis	26.9	120.11	18.5417	388.77	15.08	2.33	29.39	184.32	7.08
Zhu, 2017	Fujian, China	Native	Juncellus serotinus	26.9	120.11	18.5417	400.65	12.84	3.22	31.19	126.23	4.05
Zhu, 2017	Fujian, China	Native	Phragmites australis	26.9	120.11	18.5417	435.59	13.69	1.33	34.03	339.68	10.34
Zhu, 2017	Fujian, China	Native	Scirpus × mariqueter	26.9	120.11	18.5417	405.32	18.52	2.15	22.61	189.79	8.64
Zhu, 2017	Fujian, China	Native	Scirpus triqueter	26.9	120.11	18.5417	407.5	25.15	3.63	17.6	114.04	6.8
Zhu, 2017	Fujian, China	Non-native	Spartina alterniflora	26.9	120.11	18.5417	418.33	11.65	1.67	40.11	273.78	7.04
Zhu, 2017	Fujian, China	Native	Suaeda australis	26.9	120.11	18.5417	344.12	16.81	2.14	23.69	163.93	7.69
Sun et al., 2019	Shanghai, China	Native	Phragmites australis	31.64	121.75	15.8	539.8	46.6	1.731	11.582	311.843	26.9209
Sun et al., 2019	Shanghai, China	Native	Phragmites australis	31.64	121.75	15.8	664.23	59.97	1.852	11.0761	358.656	32.3812
Sun et al., 2019	Shanghai, China	Native	Phragmites australis	31.64	121.75	15.8	551.98	46.06	1.796	11.9841	307.339	25.6459
Sun et al., 2019	Shanghai, China	Native	Phragmites australis	31.64	121.75	15.8	546.92	45.99	1.811	11.8935	301.999	25.3948
Sun et al., 2019	Shanghai, China	Native	Phragmites australis	31.64	121.75	15.8	552.23	48.37	1.738	11.4169	317.739	27.8308
Sun et al., 2019	Shanghai, China	Native	Phragmites australis	31.64	121.75	15.8	551.43	48.47	1.786	11.3765	308.751	27.1389
Sun et al., 2019	Shanghai, China	Native	Phragmites australis	31.64	121.75	15.8	552.84	49.05	1.702	11.2703	324.818	28.819
Sun et al., 2019	Shanghai, China	Native	Phragmites australis	31.64	121.75	15.8	553.06	50.43	1.827	10.9662	302.715	27.6026
Sun et al., 2019	Shanghai, China	Native	Phragmites australis	31.64	121.75	15.8	558.59	47.34	1.878	11.8005	297.439	25.2077
Sun et al., 2019	Shanghai, China	Native	Phragmites australis	31.64	121.75	15.8	559.07	49.85	1.854	11.2152	301.548	26.8878
Sun et al., 2019	Shanghai, China	Native	Phragmites australis	31.64	121.75	15.8	562.81	51.04	2.114	11.0276	266.23	24.1438
Sun et al., 2019	Shanghai, China	Native	Phragmites australis	31.64	121.75	15.8	562.48	51.05	1.787	11.0175	314.762	28.5674
Sun et al., 2019	Shanghai, China	Native	Phragmites australis	31.64	121.75	15.8	564.17	46.73	1.83	12.0742	308.29	25.5355
Sun et al., 2019	Shanghai, China	Native	Phragmites australis	31.64	121.75	15.8	560.38	52.42	1.941	10.6892	288.707	27.0067
Sun et al., 2019	Shanghai, China	Native	Phragmites australis	31.64	121.75	15.8	561.43	49.43	1.994	11.3583	281.56	24.7894
Sun et al., 2019	Shanghai, China	Non-native	Spartina alterniflora	31.64	121.75	15.8	546.21	25.7	1.717	21.2519	318.119	14.968
Sun et al., 2019	Shanghai, China	Non-native	Spartina alterniflora	31.64	121.75	15.8	555.22	26.74	1.788	20.7645	310.526	14.9553
Sun et al., 2019	Shanghai, China	Non-native	Spartina alterniflora	31.64	121.75	15.8	558.24	22.23	2.247	25.1143	248.438	9.89319
Sun et al., 2019	Shanghai, China	Non-native	Spartina alterniflora	31.64	121.75	15.8	565.3	22.08	1.79	25.6066	315.81	12.3352
Sun et al., 2019	Shanghai, China	Non-native	Spartina alterniflora	31.64	121.75	15.8	561.81	21.28	1.653	26.3951	339.873	12.8736
Sun et al., 2019	Shanghai, China	Non-native	Spartina alterniflora	31.64	121.75	15.8	559.88	21.11	1.833	26.5254	305.445	11.5166
Sun et al., 2019	Shanghai, China	Non-native	Spartina alterniflora	31.64	121.75	15.8	560.59	22.01	1.995	25.4663	280.997	11.0326
Sun et al., 2019	Shanghai, China	Non-native	Spartina alterniflora	31.64	121.75	15.8	553.91	21.79	1.981	25.4251	279.611	10.9995
Sun et al., 2019	Shanghai, China	Non-native	Spartina alterniflora	31.64	121.75	15.8	563.52	21.57	1.987	26.1295	283.603	10.8556
Sun et al., 2019	Shanghai, China	Non-native	Spartina alterniflora	31.64	121.75	15.8	562.06	21.1	1.901	26.641	295.665	11.0994
Sun et al., 2019	Shanghai, China	Non-native	Spartina alterniflora	31.64	121.75	15.8	557.73	21.69	1.282	25.7177	435.047	16.9189
Sun et al., 2019	Shanghai, China	Non-native	Spartina alterniflora	31.64	121.75	15.8	564.79	21.97	2.211	25.7071	255.445	9.93668
Sun et al., 2019	Shanghai, China	Non-native	Spartina alterniflora	31.64	121.75	15.8	561.91	27.29	1.906	20.5895	294.811	14.3179
Sun et al., 2019	Shanghai, China	Non-native	Spartina alterniflora	31.64	121.75	15.8	564.06	25.64	1.674	22.0003	336.953	15.3166
Sun et al., 2019	Shanghai, China	Non-native	Spartina alterniflora	31.64	121.75	15.8	562.81	24.44	1.912	23.026	294.357	12.7824
Xu et al., 2020	Leizhou, China	Non-native	Spartina alterniflora	20.9055	110.17	23.2		13.2	1.8			7.33333
Xu et al., 2020	Leizhou, China	Non-native	Spartina alterniflora	20.9055	110.17	23.2		14.3	1.9			7.52632
Xu et al., 2020	Leizhou, China	Non-native	Spartina alterniflora	20.9055	110.17	23.2		13.1	1.9			6.89474
Xu et al., 2020	Leizhou, China	Non-native	Spartina alterniflora	20.8873	110.17	23.2		14.8	1.8			8.22222
Xu et al., 2020	Leizhou, China	Non-native	Spartina alterniflora	20.8873	110.17	23.2		13.3	1.7			7.82353
Xu et al., 2020	Leizhou, China	Non-native	Spartina alterniflora	20.8873	110.17	23.2		13.9	1.8			7.72222
Xu et al., 2020	Leizhou, China	Non-native	Spartina alterniflora	20.9309	110.17	23.2		16.6	1.9			8.73684
Xu et al., 2020	Leizhou, China	Non-native	Spartina alterniflora	20.9309	110.17	23.2		18	2.2			8.18182
Xu et al., 2020	Leizhou, China	Non-native	Spartina alterniflora	20.9309	110.17	23.2		18.3	1.3			14.0769
Xu et al., 2020	Leizhou, China	Non-native	Spartina alterniflora	20.9275	110.17	23.2		17.4	2.7			6.44444
Xu et al., 2020	Leizhou, China	Non-native	Spartina alterniflora	20.9275	110.17	23.2		14.2	1.7			8.35294
Xu et al., 2020	Leizhou, China	Non-native	Spartina alterniflora	20.9275	110.17	23.2		15.8	2.1			7.52381
Xu et al., 2020	Leizhou, China	Non-native	Spartina alterniflora	20.9209	110.17	23.2		17.1	1.8			9.5
Xu et al., 2020	Leizhou, China	Non-native	Spartina alterniflora	20.9209	110.17	23.2		13.5	1.7			7.94118
Xu et al., 2020	Leizhou, China	Non-native	Spartina alterniflora	20.9209	110.17	23.2		15.6	1.4			11.1429
Xu et al., 2020	Beihai, China	Non-native	Spartina alterniflora	21.6014	108.972	22.9		13.5	2.9			4.65517
Xu et al., 2020	Beihai, China	Non-native	Spartina alterniflora	21.6014	108.972	22.9		14.1	2.7			5.22222
Xu et al., 2020	Beihai, China	Non-native	Spartina alterniflora	21.6014	108.972	22.9		15.8	2.4			6.58333
Xu et al., 2020	Beihai, China	Non-native	Spartina alterniflora	21.5995	108.972	22.9		16.2	3.2			5.0625
Xu et al., 2020	Beihai, China	Non-native	Spartina alterniflora	21.5995	108.972	22.9		13.2	2.1			6.28571
Xu et al., 2020	Beihai, China	Non-native	Spartina alterniflora	21.5995	108.972	22.9		15.6	2.6			6
Xu et al., 2020	Beihai, China	Non-native	Spartina alterniflora	21.5982	108.972	22.9		13.4	2.2			6.09091
Xu et al., 2020	Beihai, China	Non-native	Spartina alterniflora	21.5982	108.972	22.9		16	2.1			7.61905
Xu et al., 2020	Beihai, China	Non-native	Spartina alterniflora	21.5982	108.972	22.9		15.2	2			7.6
Xu et al., 2020	Beihai, China	Non-native	Spartina alterniflora	21.5965	108.972	22.9		17.5	2.1			8.33333
Xu et al., 2020	Beihai, China	Non-native	Spartina alterniflora	21.5965	108.972	22.9		17.5	2			8.75
Xu et al., 2020	Beihai, China	Non-native	Spartina alterniflora	21.5965	108.972	22.9		17.7	2.6			6.80769
Xu et al., 2020	Beihai, China	Non-native	Spartina alterniflora	21.5983	108.972	22.9		17.6	3			5.86667
Xu et al., 2020	Beihai, China	Non-native	Spartina alterniflora	21.5983	108.972	22.9		16.2	2.8			5.78571
Xu et al., 2020	Beihai, China	Non-native	Spartina alterniflora	21.5983	108.972	22.9		15.9	1.8			8.83333
Xu et al., 2020	Yunxiao, China	Non-native	Spartina alterniflora	23.9165	117.417	21.7		17.6	1.8			9.77778
Xu et al., 2020	Yunxiao, China	Non-native	Spartina alterniflora	23.9165	117.417	21.7		16.6	1.7			9.76471
Xu et al., 2020	Yunxiao, China	Non-native	Spartina alterniflora	23.9165	117.417	21.7		16	1.8			8.88889
Xu et al., 2020	Yunxiao, China	Non-native	Spartina alterniflora	23.9187	117.417	21.7		14.8	1.5			9.86667
Xu et al., 2020	Yunxiao, China	Non-native	Spartina alterniflora	23.9187	117.417	21.7		18.7	2.5			7.48
Xu et al., 2020	Yunxiao, China	Non-native	Spartina alterniflora	23.9187	117.417	21.7		15	1.7			8.82353
Xu et al., 2020	Yunxiao, China	Non-native	Spartina alterniflora	23.9217	117.417	21.7		15.8	1.6			9.875
Xu et al., 2020	Yunxiao, China	Non-native	Spartina alterniflora	23.9217	117.417	21.7		16.7	1.8			9.27778
Xu et al., 2020	Yunxiao, China	Non-native	Spartina alterniflora	23.9217	117.417	21.7		16.3	1.8			9.05556
Xu et al., 2020	Yunxiao, China	Non-native	Spartina alterniflora	23.9245	117.417	21.7		19	2			9.5
Xu et al., 2020	Yunxiao, China	Non-native	Spartina alterniflora	23.9245	117.417	21.7		16.5	1.9			8.68421
Xu et al., 2020	Yunxiao, China	Non-native	Spartina alterniflora	23.9245	117.417	21.7		20.8	1.9			10.9474
Xu et al., 2020	Fuzhou, China	Non-native	Spartina alterniflora	26.0307	119.621	19.9		14.6	1.5			9.73333
Xu et al., 2020	Fuzhou, China	Non-native	Spartina alterniflora	26.0307	119.621	19.9		16.8	1.7			9.88235
Xu et al., 2020	Fuzhou, China	Non-native	Spartina alterniflora	26.0307	119.621	19.9		13.4	2			6.7
Xu et al., 2020	Fuzhou, China	Non-native	Spartina alterniflora	26.0334	119.621	19.9		10.7	1.3			8.23077
Xu et al., 2020	Fuzhou, China	Non-native	Spartina alterniflora	26.0334	119.621	19.9		12.1	1.6			7.5625
Xu et al., 2020	Fuzhou, China	Non-native	Spartina alterniflora	26.0334	119.621	19.9		8.7	1.2			7.25
Xu et al., 2020	Fuzhou, China	Non-native	Spartina alterniflora	26.0343	119.621	19.9		15.6	1.7			9.17647
Xu et al., 2020	Fuzhou, China	Non-native	Spartina alterniflora	26.0343	119.621	19.9		21.8	1.9			11.4737
Xu et al., 2020	Fuzhou, China	Non-native	Spartina alterniflora	26.0343	119.621	19.9		19.4	1.9			10.2105
Xu et al., 2020	Fuzhou, China	Non-native	Spartina alterniflora	26.0351	119.621	19.9		17.2	1.2			14.3333
Xu et al., 2020	Fuzhou, China	Non-native	Spartina alterniflora	26.0351	119.621	19.9		18.6	2			9.3
Xu et al., 2020	Fuzhou, China	Non-native	Spartina alterniflora	26.0351	119.621	19.9		15.9	1.9			8.36842
Xu et al., 2020	Wenzhou, China	Non-native	Spartina alterniflora	27.988	120.784	18.9		17.5	1.7			10.2941
Xu et al., 2020	Wenzhou, China	Non-native	Spartina alterniflora	27.988	120.784	18.9		18.4	1.5			12.2667
Xu et al., 2020	Wenzhou, China	Non-native	Spartina alterniflora	27.988	120.784	18.9		16.2	1.8			9
Xu et al., 2020	Wenzhou, China	Non-native	Spartina alterniflora	27.9821	120.784	18.9		15.2	1.8			8.44444
Xu et al., 2020	Wenzhou, China	Non-native	Spartina alterniflora	27.9821	120.784	18.9		19	2			9.5
Xu et al., 2020	Wenzhou, China	Non-native	Spartina alterniflora	27.9821	120.784	18.9		20.7	1.5			13.8
Xu et al., 2020	Wenzhou, China	Non-native	Spartina alterniflora	27.9829	120.784	18.9		22.9	1.9			12.0526
Xu et al., 2020	Wenzhou, China	Non-native	Spartina alterniflora	27.9829	120.784	18.9		22.4	2.1			10.6667
Xu et al., 2020	Wenzhou, China	Non-native	Spartina alterniflora	27.9829	120.784	18.9		22.3	1.7			13.1176
Xu et al., 2020	Wenzhou, China	Non-native	Spartina alterniflora	27.9851	120.784	18.9		23.8	1.9			12.5263
Xu et al., 2020	Wenzhou, China	Non-native	Spartina alterniflora	27.9851	120.784	18.9		16.2	1.6			10.125
Xu et al., 2020	Wenzhou, China	Non-native	Spartina alterniflora	27.9851	120.784	18.9		19.9	1.7			11.7059
Xu et al., 2020	Chongming, China	Non-native	Spartina alterniflora	31.6717	121.667	15.8		15.3	1.5			10.2
Xu et al., 2020	Chongming, China	Non-native	Spartina alterniflora	31.6717	121.667	15.8		15.2	1.4			10.8571
Xu et al., 2020	Chongming, China	Non-native	Spartina alterniflora	31.6717	121.667	15.8		13.3	1.2			11.0833
Xu et al., 2020	Chongming, China	Non-native	Spartina alterniflora	31.6688	121.667	15.8		11.9	1.3			9.15385
Xu et al., 2020	Chongming, China	Non-native	Spartina alterniflora	31.6688	121.667	15.8		12.4	1.3			9.53846
Xu et al., 2020	Chongming, China	Non-native	Spartina alterniflora	31.6688	121.667	15.8		13.2	1.5			8.8
Xu et al., 2020	Chongming, China	Non-native	Spartina alterniflora	31.6645	121.667	15.8		13	1.8			7.22222
Xu et al., 2020	Chongming, China	Non-native	Spartina alterniflora	31.6645	121.667	15.8		14	1.9			7.36842
Xu et al., 2020	Chongming, China	Non-native	Spartina alterniflora	31.6645	121.667	15.8		13.8	1.6			8.625
Xu et al., 2020	Chongming, China	Non-native	Spartina alterniflora	31.6627	121.667	15.8		15.6	1.6			9.75
Xu et al., 2020	Chongming, China	Non-native	Spartina alterniflora	31.6627	121.667	15.8		17.1	1.7			10.0588
Xu et al., 2020	Chongming, China	Non-native	Spartina alterniflora	31.6627	121.667	15.8		17.4	2.2			7.90909
Xu et al., 2020	Yancheng, China	Non-native	Spartina alterniflora	33.0924	120.576	14.4		15.2	1.7			8.94118
Xu et al., 2020	Yancheng, China	Non-native	Spartina alterniflora	33.0924	120.576	14.4		16.9	1.8			9.38889
Xu et al., 2020	Yancheng, China	Non-native	Spartina alterniflora	33.0924	120.576	14.4		18.9	1.8			10.5
Xu et al., 2020	Yancheng, China	Non-native	Spartina alterniflora	33.0865	120.576	14.4		16	1.7			9.41176
Xu et al., 2020	Yancheng, China	Non-native	Spartina alterniflora	33.0865	120.576	14.4		15.6	1.4			11.1429
Xu et al., 2020	Yancheng, China	Non-native	Spartina alterniflora	33.0865	120.576	14.4		14.9	1.8			8.27778
Xu et al., 2020	Yancheng, China	Non-native	Spartina alterniflora	33.0806	120.576	14.4		17.3	2			8.65
Xu et al., 2020	Yancheng, China	Non-native	Spartina alterniflora	33.0806	120.576	14.4		15.3	1.6			9.5625
Xu et al., 2020	Yancheng, China	Non-native	Spartina alterniflora	33.0806	120.576	14.4		14.1	1.4			10.0714
Xu et al., 2020	Yancheng, China	Non-native	Spartina alterniflora	33.0758	120.576	14.4		15.9	1.6			9.9375
Xu et al., 2020	Yancheng, China	Non-native	Spartina alterniflora	33.0758	120.576	14.4		15.1	1.9			7.94737
Xu et al., 2020	Yancheng, China	Non-native	Spartina alterniflora	33.0758	120.576	14.4		14.3	1.5			9.53333
Xu et al., 2020	Dongying, China	Non-native	Spartina alterniflora	37.8004	119.2	13.2		12.6	1.1			11.4545
Xu et al., 2020	Dongying, China	Non-native	Spartina alterniflora	37.8004	119.2	13.2		12.7	1.1			11.5455
Xu et al., 2020	Dongying, China	Non-native	Spartina alterniflora	37.8004	119.2	13.2		11.9	1			11.9
Xu et al., 2020	Dongying, China	Non-native	Spartina alterniflora	37.7998	119.2	13.2		12.5	1.3			9.61538
Xu et al., 2020	Dongying, China	Non-native	Spartina alterniflora	37.7998	119.2	13.2		13.6	1.5			9.06667
Xu et al., 2020	Dongying, China	Non-native	Spartina alterniflora	37.7998	119.2	13.2		13	1.4			9.28571
Xu et al., 2020	Dongying, China	Non-native	Spartina alterniflora	37.8008	119.2	13.2		14.6	1.6			9.125
Xu et al., 2020	Dongying, China	Non-native	Spartina alterniflora	37.8008	119.2	13.2		11.6	1.2			9.66667
Xu et al., 2020	Dongying, China	Non-native	Spartina alterniflora	37.8008	119.2	13.2		10.1	1.3			7.76923
Xu et al., 2020	Tianjing, China	Non-native	Spartina alterniflora	39.0782	117.81	13		17.8	2			8.9
Xu et al., 2020	Tianjing, China	Non-native	Spartina alterniflora	39.0782	117.81	13		19.3	1.9			10.1579
Xu et al., 2020	Tianjing, China	Non-native	Spartina alterniflora	39.0782	117.81	13		25.1	2.1			11.9524
Xu et al., 2020	Tianjing, China	Non-native	Spartina alterniflora	39.0757	117.81	13		17.8	1.9			9.36842
Xu et al., 2020	Tianjing, China	Non-native	Spartina alterniflora	39.0757	117.81	13		12.8	1.3			9.84615
Xu et al., 2020	Tianjing, China	Non-native	Spartina alterniflora	39.0757	117.81	13		19.3	2			9.65
Xu et al., 2020	Tianjing, China	Non-native	Spartina alterniflora	39.073	117.81	13		30.3	2.9			10.4483
Xu et al., 2020	Tianjing, China	Non-native	Spartina alterniflora	39.073	117.81	13		25.7	2.5			10.28
Xu et al., 2020	Tianjing, China	Non-native	Spartina alterniflora	39.073	117.81	13		22.3	2			11.15
Xu et al., 2020	Jinzhou, China	Non-native	Spartina alterniflora	40.7986	121.06	9.2		17.4	3.3			5.27273
Xu et al., 2020	Jinzhou, China	Non-native	Spartina alterniflora	40.7986	121.06	9.2		20.4	3.7			5.51351
Xu et al., 2020	Jinzhou, China	Non-native	Spartina alterniflora	40.7986	121.06	9.2		19.2	2.7			7.11111
Xu et al., 2020	Jinzhou, China	Non-native	Spartina alterniflora	40.8059	121.06	9.2		17.2	2.3			7.47826
Xu et al., 2020	Jinzhou, China	Non-native	Spartina alterniflora	40.8059	121.06	9.2		20.5	2.3			8.91304
Xu et al., 2020	Jinzhou, China	Non-native	Spartina alterniflora	40.8059	121.06	9.2		18.9	2.5			7.56
Xu et al., 2020	Jinzhou, China	Non-native	Spartina alterniflora	40.8089	121.06	9.2		19.9	1.8			11.0556
Xu et al., 2020	Jinzhou, China	Non-native	Spartina alterniflora	40.8089	121.06	9.2		21.2	2.5			8.48
Xu et al., 2020	Jinzhou, China	Non-native	Spartina alterniflora	40.8089	121.06	9.2		20.6	2.9			7.10345
Xu et al., 2020	Beihai, China	Native	Phragmites australis	21.5784	108.972	22.9		21.1502	1.13224			18.68
Xu et al., 2020	Beihai, China	Native	Phragmites australis	21.5784	108.972	22.9		19.6603	1.17431			16.742
Xu et al., 2020	Beihai, China	Native	Phragmites australis	21.5784	108.972	22.9		20.2561	1.14187			17.7394
Xu et al., 2020	Beihai, China	Native	Phragmites australis	21.5735	108.972	22.9		22.6103	1.28692			17.5693
Xu et al., 2020	Beihai, China	Native	Phragmites australis	21.5735	108.972	22.9		21.5622	1.30625			16.507
Xu et al., 2020	Beihai, China	Native	Phragmites australis	21.5735	108.972	22.9		22.5957	1.33389			16.9397
Xu et al., 2020	Beihai, China	Native	Phragmites australis	21.5801	108.972	22.9		21.4414	1.15227			18.6079
Xu et al., 2020	Beihai, China	Native	Phragmites australis	21.5801	108.972	22.9		19.7977	1.00051			19.7876
Xu et al., 2020	Beihai, China	Native	Phragmites australis	21.5801	108.972	22.9		20.88	1.2984			16.0813
Xu et al., 2020	Yunxiao, China	Native	Phragmites australis	23.9341	117.417	21.7		27.1	1.58187			17.1316
Xu et al., 2020	Yunxiao, China	Native	Phragmites australis	23.9341	117.417	21.7		23.6855	1.4925			15.8697
Xu et al., 2020	Yunxiao, China	Native	Phragmites australis	23.9341	117.417	21.7		25.9158	1.63691			15.8321
Xu et al., 2020	Yunxiao, China	Native	Phragmites australis	23.934	117.417	21.7		27.787	1.55987			17.8137
Xu et al., 2020	Yunxiao, China	Native	Phragmites australis	23.934	117.417	21.7		25.8414	1.265			20.4279
Xu et al., 2020	Yunxiao, China	Native	Phragmites australis	23.934	117.417	21.7		20.6473	1.13812			18.1415
Xu et al., 2020	Yunxiao, China	Native	Phragmites australis	23.9338	117.417	21.7		30.8228	1.515			20.3451
Xu et al., 2020	Yunxiao, China	Native	Phragmites australis	23.9338	117.417	21.7		29.3829	1.66959			17.5988
Xu et al., 2020	Yunxiao, China	Native	Phragmites australis	23.9338	117.417	21.7		28.0331	1.44279			19.4298
Xu et al., 2020	Fuzhou, China	Native	Phragmites australis	26.0326	119.621	19.9		22.6	1.05372			21.4478
Xu et al., 2020	Fuzhou, China	Native	Phragmites australis	26.0326	119.621	19.9		25.2	1.22986			20.4901
Xu et al., 2020	Fuzhou, China	Native	Phragmites australis	26.0326	119.621	19.9		24.9	1.43663			17.3323
Xu et al., 2020	Fuzhou, China	Native	Phragmites australis	26.0336	119.621	19.9		24.1	1.41131			17.0763
Xu et al., 2020	Fuzhou, China	Native	Phragmites australis	26.0336	119.621	19.9		27.7	1.5277			18.1318
Xu et al., 2020	Fuzhou, China	Native	Phragmites australis	26.0336	119.621	19.9		27.3	1.54797			17.636
Xu et al., 2020	Fuzhou, China	Native	Phragmites australis	26.0396	119.621	19.9		30.3	1.37413			22.0502
Xu et al., 2020	Fuzhou, China	Native	Phragmites australis	26.0396	119.621	19.9		22.1	1.48274			14.9049
Xu et al., 2020	Fuzhou, China	Native	Phragmites australis	26.0396	119.621	19.9		23.5	1.40398			16.7382
Xu et al., 2020	Wenzhou, China	Native	Phragmites australis	27.9851	120.784	18.9		29.4032	2.01544			14.589
Xu et al., 2020	Wenzhou, China	Native	Phragmites australis	27.9851	120.784	18.9		24.5203	1.41042			17.3851
Xu et al., 2020	Wenzhou, China	Native	Phragmites australis	27.9851	120.784	18.9		29.9062	1.59679			18.7289
Xu et al., 2020	Wenzhou, China	Native	Phragmites australis	27.9829	120.784	18.9		29.1034	1.35523			21.4748
Xu et al., 2020	Wenzhou, China	Native	Phragmites australis	27.9829	120.784	18.9		27.9014	1.32443			21.0667
Xu et al., 2020	Wenzhou, China	Native	Phragmites australis	27.9829	120.784	18.9		29.815	1.3			22.9346
Xu et al., 2020	Wenzhou, China	Native	Phragmites australis	27.9821	120.784	18.9		26.9719	1.6867			15.9909
Xu et al., 2020	Wenzhou, China	Native	Phragmites australis	27.9821	120.784	18.9		31.9347	1.53015			20.8704
Xu et al., 2020	Wenzhou, China	Native	Phragmites australis	27.9821	120.784	18.9		31.7423	1.25069			25.3798
Xu et al., 2020	Chongming, China	Native	Phragmites australis	31.6971	121.667	15.8		24.6493	1.18125			20.8671
Xu et al., 2020	Chongming, China	Native	Phragmites australis	31.6971	121.667	15.8		22.5438	1.15786			19.4703
Xu et al., 2020	Chongming, China	Native	Phragmites australis	31.6971	121.667	15.8		23.7634	1.40985			16.8553
Xu et al., 2020	Chongming, China	Native	Phragmites australis	31.6943	121.667	15.8		23.0115	1.20903			19.033
Xu et al., 2020	Chongming, China	Native	Phragmites australis	31.6943	121.667	15.8		26.4234	1.46118			18.0835
Xu et al., 2020	Chongming, China	Native	Phragmites australis	31.6943	121.667	15.8		25.9	1.43317			18.0718
Xu et al., 2020	Chongming, China	Native	Phragmites australis	31.6918	121.667	15.8		25.4	1.34167			18.9317
Xu et al., 2020	Chongming, China	Native	Phragmites australis	31.6918	121.667	15.8		27.9	1.42837			19.5328
Xu et al., 2020	Chongming, China	Native	Phragmites australis	31.6918	121.667	15.8		26	1.2628			20.5891
Xu et al., 2020	Dafeng, China	Native	Phragmites australis	34.1078	120.31	14.4		23.2066	1.25074			18.5544
Xu et al., 2020	Dafeng, China	Native	Phragmites australis	34.1078	120.31	14.4		19.4969	1.08462			17.9758
Xu et al., 2020	Dafeng, China	Native	Phragmites australis	34.1078	120.31	14.4		21.9851	1.24438			17.6676
Xu et al., 2020	Dafeng, China	Native	Phragmites australis	34.109	120.31	14.4		21.5549	1.21402			17.7549
Xu et al., 2020	Dafeng, China	Native	Phragmites australis	34.109	120.31	14.4		20.2495	1.18812			17.0432
Xu et al., 2020	Dafeng, China	Native	Phragmites australis	34.109	120.31	14.4		20.3646	1.29122			15.7716
Xu et al., 2020	Dafeng, China	Native	Phragmites australis	34.1033	120.31	14.4		25.0887	1.52041			16.5013
Xu et al., 2020	Dafeng, China	Native	Phragmites australis	34.1033	120.31	14.4		22.8869	1.33426			17.1533
Xu et al., 2020	Dafeng, China	Native	Phragmites australis	34.1033	120.31	14.4		22.0991	1.46689			15.0652
Xu et al., 2020	Dongying, China	Native	Phragmites australis	37.7355	119.2	13.2		27.0866	1.27039			21.3214
Xu et al., 2020	Dongying, China	Native	Phragmites australis	37.7355	119.2	13.2		27.4336	1.19609			22.936
Xu et al., 2020	Dongying, China	Native	Phragmites australis	37.7355	119.2	13.2		27.3529	1.3425			20.3746
Xu et al., 2020	Dongying, China	Native	Phragmites australis	37.7392	119.2	13.2		24.5269	1.19609			20.5058
Xu et al., 2020	Dongying, China	Native	Phragmites australis	37.7392	119.2	13.2		23.5424	1.16937			20.1325
Xu et al., 2020	Dongying, China	Native	Phragmites australis	37.7392	119.2	13.2		22.9063	1.07652			21.2782
Xu et al., 2020	Dongying, China	Native	Phragmites australis	37.7433	119.2	13.2		25.2913	1.30379			19.3983
Xu et al., 2020	Dongying, China	Native	Phragmites australis	37.7433	119.2	13.2		25.9247	1.10691			23.4206
Xu et al., 2020	Dongying, China	Native	Phragmites australis	37.7433	119.2	13.2		24.8802	1.10062			22.6055
Xu et al., 2020	Dongying, China	Native	Phragmites australis	37.7309	119.2	13.2		24.125	1.20988			19.94
Xu et al., 2020	Dongying, China	Native	Phragmites australis	37.7309	119.2	13.2		28.0875	1.4425			19.4714
Xu et al., 2020	Dongying, China	Native	Phragmites australis	37.7309	119.2	13.2		27.0921	1.26987			21.3345
Xu et al., 2020	Panjin, China	Native	Phragmites australis	40.8574	121.772	9.2		22.6712	1.175			19.2946
Xu et al., 2020	Panjin, China	Native	Phragmites australis	40.8574	121.772	9.2		17.7677	0.866026			20.5163
Xu et al., 2020	Panjin, China	Native	Phragmites australis	40.8574	121.772	9.2		21.8074	0.986029			22.1164
Xu et al., 2020	Panjin, China	Native	Phragmites australis	40.8542	121.772	9.2		18.6295	0.960135			19.403
Xu et al., 2020	Panjin, China	Native	Phragmites australis	40.8542	121.772	9.2		19.3791	0.96859			20.0076
Xu et al., 2020	Panjin, China	Native	Phragmites australis	40.8542	121.772	9.2		19.8002	1.0348			19.1343
Xu et al., 2020	Panjin, China	Native	Phragmites australis	40.8538	121.772	9.2		17.4789	0.891532			19.6055
Xu et al., 2020	Panjin, China	Native	Phragmites australis	40.8538	121.772	9.2		22.6074	0.9875			22.8935
Xu et al., 2020	Panjin, China	Native	Phragmites australis	40.8538	121.772	9.2		22.8753	1.03446			22.1133
Liu et al., 2020	Chinese coast	Non-native	Spartina alterniflora	21.0832	110.17	15.7	408.297	15.3463	1.84876	26.6055	220.849	8.30087
Liu et al., 2020	Chinese coast	Non-native	Spartina alterniflora	21.6503	108.972	15.7	429.597	15.7698	2.43587	27.2417	176.363	6.47402
Liu et al., 2020	Chinese coast	Non-native	Spartina alterniflora	24.0503	117.417	15.7	409.302	17.3442	1.84037	23.5987	222.402	9.42432
Liu et al., 2020	Chinese coast	Non-native	Spartina alterniflora	26.1022	119.621	15.7	425.536	15.5651	1.66827	27.3391	255.076	9.33007
Liu et al., 2020	Chinese coast	Non-native	Spartina alterniflora	28.025	120.784	15.7	418.593	19.7512	1.77028	21.1933	236.455	11.1571
Liu et al., 2020	Chinese coast	Non-native	Spartina alterniflora	31.7355	121.667	15.7	420.454	14.5318	1.80559	28.9334	232.862	8.04819
Liu et al., 2020	Chinese coast	Non-native	Spartina alterniflora	33.0642	120.576	15.7	433.481	16.0794	1.70994	26.9588	253.507	9.40348
Liu et al., 2020	Chinese coast	Non-native	Spartina alterniflora	37.8693	119.2	15.7	421.275	12.8482	1.40375	32.7885	300.107	9.15279
Liu et al., 2020	Chinese coast	Non-native	Spartina alterniflora	39.1542	117.81	15.7	399.699	21.5351	2.08057	18.5603	192.11	10.3506
Liu et al., 2020	Chinese coast	Native	Phragmites australis	21.7418	108.972	15.7	415.998	21.3029	1.22759	19.5277	338.874	17.3535
Liu et al., 2020	Chinese coast	Native	Phragmites australis	24.0244	117.417	15.7	427.111	26.8184	1.31613	15.926	324.52	20.3767
Liu et al., 2020	Chinese coast	Native	Phragmites australis	26.1248	119.621	15.7	423.129	25.5778	1.38608	16.5428	305.27	18.4533
Liu et al., 2020	Chinese coast	Native	Phragmites australis	28.0252	120.784	15.7	424.444	29.2826	1.46894	14.4947	288.947	19.9346
Liu et al., 2020	Chinese coast	Native	Phragmites australis	31.7239	121.667	15.7	424.93	25.3918	1.32929	16.735	319.668	19.1018
Liu et al., 2020	Chinese coast	Native	Phragmites australis	34.1941	120.31	15.7	438.462	22.2109	1.30079	19.7409	337.073	17.0749
Liu et al., 2020	Chinese coast	Native	Phragmites australis	37.8436	119.2	15.7	433.059	26.0935	1.23234	16.5964	351.412	21.1739
Kettenring et al., 2009	Chesapeake Bay, USA	Non-native	Phragmites australis	38.9	-76.5	15.7		22.9006	1.128			20.302
Kettenring et al., 2009	Chesapeake Bay, USA	Non-native	Phragmites australis	38.9	-76.5	15.7		22.9033	1.1684			19.6023
Kettenring et al., 2009	Chesapeake Bay, USA	Non-native	Phragmites australis	38.9	-76.5	15.7		23.5945	1.2881			18.3173
Kettenring et al., 2009	Chesapeake Bay, USA	Non-native	Phragmites australis	38.9	-76.5	15.7		23.6927	1.3485			17.5697
Kettenring et al., 2009	Chesapeake Bay, USA	Non-native	Phragmites australis	38.9	-76.5	15.7		24.4905	1.4384			17.0262
Kettenring et al., 2009	Chesapeake Bay, USA	Non-native	Phragmites australis	38.9	-76.5	15.7		25.0003	1.5088			16.5697
Kettenring et al., 2009	Chesapeake Bay, USA	Non-native	Phragmites australis	38.9	-76.5	15.7		25.0036	1.3172			18.9824
Kettenring et al., 2009	Chesapeake Bay, USA	Non-native	Phragmites australis	38.9	-76.5	15.7		24.9779	1.3389			18.6555
Kettenring et al., 2009	Chesapeake Bay, USA	Non-native	Phragmites australis	38.9	-76.5	15.7		25.3947	1.3984			18.1598
Kettenring et al., 2009	Chesapeake Bay, USA	Non-native	Phragmites australis	38.9	-76.5	15.7		27.2107	1.4786			18.403
Kettenring et al., 2009	Chesapeake Bay, USA	Non-native	Phragmites australis	38.9	-76.5	15.7		27.3914	1.5394			17.7936
Kettenring et al., 2009	Chesapeake Bay, USA	Non-native	Phragmites australis	38.9	-76.5	15.7		27.001	1.5892			16.9903
Kettenring et al., 2009	Chesapeake Bay, USA	Non-native	Phragmites australis	38.9	-76.5	15.7		27.6985	1.7598			15.7396
Kettenring et al., 2009	Chesapeake Bay, USA	Non-native	Phragmites australis	38.9	-76.5	15.7		29.4973	1.6594			17.7759
Kettenring et al., 2009	Chesapeake Bay, USA	Non-native	Phragmites australis	38.9	-76.5	15.7		31.9919	1.5284			20.9316
Kettenring et al., 2009	Chesapeake Bay, USA	Non-native	Phragmites australis	38.9	-76.5	15.7		33.7849	1.5388			21.9554
Kettenring et al., 2009	Chesapeake Bay, USA	Non-native	Phragmites australis	38.9	-76.5	15.7		32.3955	1.448			22.3726
Kettenring et al., 2009	Chesapeake Bay, USA	Non-native	Phragmites australis	38.9	-76.5	15.7		30.3846	1.3779			22.0514
Kettenring et al., 2009	Chesapeake Bay, USA	Non-native	Phragmites australis	38.9	-76.5	15.7		28.3903	1.3379			21.22
Kettenring et al., 2009	Chesapeake Bay, USA	Non-native	Phragmites australis	38.9	-76.5	15.7		26.693	1.3284			20.0941
